## 1                    **Peptidomimetic blockade of MYB in acute myeloid leukemia**

2  
3  
4    Kavitha Ramaswamy<sup>1,2</sup>, Lauren Forbes<sup>1,7</sup>, Gerard Minuesa<sup>1</sup>, Tatyana Gindin<sup>3</sup>, Fiona Brown<sup>1</sup>,  
5    Michael Kharas<sup>1</sup>, Andrei Krivtsov<sup>4,6</sup>, Scott Armstrong<sup>2,4,6</sup>, Eric Still<sup>1</sup>, Elisa de Stanchina<sup>5</sup>, Birgit  
6    Knoechel<sup>6</sup>, Richard Koche<sup>4</sup>, Alex Kentsis<sup>1,2,7\*</sup>

7  
8  
9    <sup>1</sup> Molecular Pharmacology Program, Sloan Kettering Institute, New York, NY, USA.

10    <sup>2</sup> Department of Pediatrics, Memorial Sloan Kettering Cancer Center, New York, NY, USA.

11    <sup>3</sup> Department of Pathology and Cell Biology, Columbia University Medical Center and New York  
12    Presbyterian Hospital, New York, NY, USA.

13    <sup>4</sup> Center for Epigenetics Research, Sloan Kettering Institute, New York, NY, USA.

14    <sup>5</sup> Antitumor Assessment Core Facility, Memorial Sloan Kettering Cancer Center, New York, NY,  
15    USA.

16    <sup>6</sup> Department of Pediatric Oncology, Dana-Farber Cancer Institute, Boston, MA, USA.

17    <sup>7</sup> Weill Cornell Medical College, Cornell University, New York, NY, USA.

18  
19    \* Correspondence should be addressed to A.K. (kentsisresearchgroup@gmail.com).

20 **ABSTRACT**

21

22 Aberrant gene expression is a hallmark of acute leukemias. However, therapeutic strategies for  
23 its blockade are generally lacking, largely due to the pharmacologic challenges of drugging  
24 transcription factors. MYB-driven gene trans-activation with CREB-binding protein (CBP)/P300  
25 is required for the initiation and maintenance of a variety of acute lymphoblastic and myeloid  
26 leukemias, including refractory MLL-rearranged leukemias. Using structure-guided molecular  
27 design, we developed a prototypical peptidomimetic inhibitor MYBMIM that interferes with the  
28 assembly of the molecular MYB:CBP/P300 complex at micromolar concentrations and rapidly  
29 accumulates in the nuclei of AML cells. We found that treatment of AML cells with MYBMIM, led  
30 to the displacement of the MYB:CBP/P300 complex in cells, displacement of MYB from  
31 oncogenic enhancers and promoters enriched for MYB binding sites, and downregulation of  
32 MYB-dependent gene expression, including of *MYC* and *BCL2* oncogenes. Both human MLL-  
33 rearranged and non-rearranged AML cells, underwent mitochondrial apoptosis in response to  
34 MYBMIM treatment, which could be partially rescued by ectopic expression of *BCL2*. We  
35 observed that MYBMIM treatment impeded leukemia growth and extended survival of  
36 immunodeficient mice engrafted with primary patient-derived MLL-rearranged leukemia cells.  
37 These findings emphasize the exquisite dependence of human AML on MYB:CBP/P300  
38 transcriptional dysregulation, and establish a pharmacologic approach for its therapeutic  
39 blockade.

## 40 INTRODUCTION

41

42 Despite recent efforts to improve stratification of conventional chemotherapy for the  
43 treatment of patients with acute myeloid leukemia (AML), survival rates remain less than 70%  
44 and 40% for children and adults, respectively <sup>3,4</sup>. Recent genomic profiling studies have begun  
45 to reveal that AML is characterized by the predominance of mutations of genes encoding  
46 regulators of gene transcription and chromatin structure <sup>5,6</sup>. Indeed, most AML chromosomal  
47 translocations, such as those involving *MLL (KMT2A)* gene rearrangements, encode chimeric  
48 transcription or chromatin remodeling factors <sup>7</sup>. Recent functional genomic efforts have identified  
49 specific molecular dependencies of aberrant AML gene expression, such as the requirement of  
50 *DOT1L* for the maintenance of *MLL*-rearranged leukemias, prompting the clinical development  
51 of *DOT1L* methyltransferase inhibitors for AML therapy <sup>8,9</sup>. Similarly, additional AML subtypes  
52 appear dependent on aberrant regulation of gene expression, conferring a susceptibility to  
53 inhibition of CDK8 and BRD4 that in part regulate the Mediator transcriptional coactivation  
54 complex <sup>2,10,11</sup>.

55 In addition, recent studies have also implicated aberrant activity of hematopoietic  
56 transcription factors and their co-activators, such as MYB and CBP/P300, in recruitment of the  
57 basal transcriptional apparatus in AML cells <sup>2,12,13</sup>. In particular, MYB is a sequence-specific  
58 hematopoietic transcription factor that is translocated and aberrantly duplicated in a subset of T-  
59 cell acute lymphoblastic leukemias (T-ALL) <sup>14,15</sup>. Leukemogenic activities of MYB require its  
60 physical and specific association with the transcriptional co-activator CBP and its nearly  
61 identical paralogue P300 <sup>12</sup>. This interaction is associated with the recruitment of CBP/P300 and  
62 its chromatin remodeling of transcriptional circuits required for leukemogenesis <sup>16</sup>.

63 While CBP/P300 can be inactivated by nonsense and missense mutations in a variety of  
64 cancers including acute lymphoblastic leukemias <sup>17</sup>, both MYB and CBP/P300 are not currently

65 known to be mutated in AML <sup>18</sup>. Importantly, transient suppression of MYB expression can  
66 eliminate *MLL-AF9* leukemias but is dispensable for normal myelopoiesis, emphasizing its  
67 specific functional requirements in AML pathogenesis <sup>2</sup>. In addition, the *Booreana* strain of mice  
68 that is mutant for Myb E308G in its transcriptional activation domain and impairs the molecular  
69 recognition of Myb by the KIX domain of Cbp/p300, exhibits normal hematopoiesis, but is  
70 resistant to leukemogenesis induced by the *MLL-AF9* and *AML1-ETO* oncogenes <sup>12</sup>. Altogether,  
71 these considerations raise the possibility that blockade of aberrant transcriptional coactivation  
72 by CBP/P300 and its transcription factors may be a potential therapeutic strategy in AML.

73 Previous attempts to interfere with aberrant transcriptional coactivation in AML have  
74 focused on the pharmacologic blockade of lysyl acetyltransferase activities of CBP/P300 <sup>19,20</sup>. In  
75 addition, chetomin and naphthol derivatives have been identified to interfere with the protein-  
76 protein interactions of the MYB-CBP/P300 complex <sup>21-23</sup>. Here, we extended these efforts by  
77 focusing on the specific requirement of MYB E308 in its transcriptional activation domain for  
78 molecular recognition of the CBP/P300 KIX domain to therapeutically target and dismantle the  
79 assembly of the MYB:CBP/P300 leukemogenic transcription factor-coactivator complex, as  
80 hypothesized previously <sup>1,12,24</sup>. Using molecular dynamics simulations and structural analysis of  
81 the MYB:CBP/P300 molecular complex, we designed a stabilized, cell-penetrant peptidomimetic  
82 inhibitor of MYB:CBP/P300 binding, termed MYBMIM. Consequently, we investigated its  
83 molecular and cellular activities, blockade of leukemogenic gene expression, and therapeutic  
84 potential in preclinical leukemia models *in vitro* and *in vivo*.

85 **Results**

86

87 **Design and binding activity of peptidomimetic MYB:CBP inhibitor MYBMIM**

88         Stereoselective substitution of D-amino acids in peptides and their fusion to protein  
89 transduction domains have been used to enhance their stability and intracellular delivery,  
90 respectively <sup>25,26</sup>. Based on the importance of the Myb E308 residue for MYB:CBP/P300  
91 binding and leukemic transformation <sup>1,12,24</sup>, we reasoned that a peptide designed to compete  
92 with this region of MYB might represent an effective therapeutic inhibitor. We thus developed a  
93 peptide mimetic of MYB residues 293-310, based on the high-resolution structure of the  
94 MYB:CBP/P300 complex (Figure 1a). We fused this peptide to the cationic cell-penetrant TAT  
95 peptide, as optimized by Dowdy and colleagues<sup>27-30</sup>. The peptide was designed in the retro-  
96 inverso orientation containing D-amino acids, and termed MYBMIM (Figure 1b, Supplementary  
97 Table 1). Since retro-inverso strategies are able to mimic selected helical peptides <sup>31,32</sup>, we used  
98 molecular dynamics simulations to model the binding of the retro-inverso and native forms of  
99 MYB peptides to the CBP/P300 KIX domain (Figure 1b). This analysis revealed that the retro-  
100 inversion of MYB peptide stereochemistry is compatible with binding to the CBP/P300 KIX  
101 domain, as evidenced by the largely complete preservation of key MYB:CBP/P300 contacts,  
102 including the E308:H602 and R294:E665 salt bridges, and the L302 hydrophobic burial  
103 (Supplementary Figure 1). We also designed inactive versions of MYBMIM, termed TG1, TG2,  
104 and TG3 (Supplementary Table 1), that are identical to MYBMIM with the exception of  
105 substitutions of R294G, L302G, and/or E308G residues that make key contacts with CBP/P300,  
106 as identified from molecular dynamics simulations (Figure 1a & b, Supplementary Figure 1).  
107 Using microscale thermophoresis, we empirically measured binding affinities of MYBMIM, its L-  
108 amino acid containing counterpart MYB, TG1, TG2, and TG3 to the purified recombinant CBP  
109 KIX domain, as compared to the control TAT peptide (Figure 1c). We observed that MYBMIM

110 bound to the CBP KIX domain in a MYB, not TAT, peptide-dependent manner, albeit with a  
111 slightly reduced binding affinity as compared to the L-amino acid peptide, consistent with the  
112 expected effects of retro-inversion. The TG1, TG2, and TG3 analogues exhibited progressively  
113 reduced affinities to the CBP KIX domain, consistent with the destabilizing effects of their  
114 substitutions (Figure 1c). TG3 showed the lowest affinity to the CBP KIX domain, confirming  
115 that it is suitable as an inactive analogue of MYBMIM. Using live cell confocal fluorescence  
116 microscopy of fluorescein isothiocyanate (FITC)-conjugated MYBMIM peptide, we confirmed  
117 rapid MYBMIM accumulation in the nuclei of MLL-rearranged MV-411 AML cells (Figure 1d).  
118 These results suggest that MYBMIM may constitute an approach for the pharmacologic  
119 blockade of MYB:CBP/P300 transcriptional coactivator complex in leukemia cells.

120 To test this hypothesis directly, we immobilized biotinylated forms of MYBMIM (BIO-  
121 MYBMIM) on streptavidin-conjugated beads (Supplementary Table 1), and used them to affinity-  
122 purify CBP/P300 from native cellular extracts of MLL-rearranged MV-411 cells (Figure 1e).  
123 Consistent with the computational and empiric binding studies (Figures 1b & c), we observed  
124 efficient and specific binding of BIO-MYBMIM to CBP/P300 in cellular extracts, as evidenced by  
125 the displacement of cellular CBP/P300 by competition with excess of free MYBMIM, but not by  
126 the retro-inverso TAT control peptide (RI-TAT, Figure 1e). To determine the ability of MYBMIM  
127 to dissociate the MYB:CBP/P300 complex in AML cells, we purified the MYB:CBP/P300  
128 complex by immunoprecipitation using specific anti-MYB antibodies in the presence of 0 or 20  
129  $\mu$ M free MYBMIM, and determined its composition by Western immunoblotting (Figure 1f). We  
130 found that MYBMIM competition led to significant dissociation of the cellular MYB:CBP/P300  
131 complex, as compared to untreated or control treated complexes (Figure 1f), consistent with the  
132 competitive binding affinities of the retro-inverso MYBMIM and native MYB peptides to the CBP  
133 KIX domain *in vitro* (Figure 1c). Thus, MYBMIM is a specific peptidomimetic inhibitor of  
134 MYB:CBP/P300 complex assembly in cells.

135

## 136 **MYBMIM suppresses transcriptional enhancers and activation in AML cells**

137 MYB and CBP/P300 mediate their transcriptional co-activation effects in part through the  
138 assembly and stabilization of transcription factor complexes at specific enhancers and promoter  
139 elements <sup>33,34</sup>. Thus, dissociation of the MYB:CBP/P300 complex by MYBMIM would be  
140 expected to reduce MYB-dependent occupancy and gene trans-activation at specific target  
141 genes responsible for aberrant leukemia cell growth and survival. To investigate the effects of  
142 MYBMIM on gene expression in AML cells, we analyzed transcriptome profiles of MLL-  
143 rearranged MOLM-13 cells treated with MYBMIM as compared to TG3 control using RNA  
144 sequencing (RNA-seq). We observed no significant changes in gene expression induced by  
145 TG3 as compared to mock-treated cells, confirming the specificity of MYBMIM-induced effects  
146 (Figure 2a). In contrast, we observed that treatment with MYBMIM induced significant  
147 downregulation of *BCL2*, *MYC*, *GFI1*, *MTL5*, *IKZF1* gene expression (Figure 2b, Supplementary  
148 Data S1), in agreement with prior studies of MYB-regulated genes in myeloid cells <sup>35</sup>. In addition  
149 to a total of 1,730 significantly downregulated genes, we also observed a total of 2,232 genes  
150 that were significantly upregulated upon MYBMIM treatment, consistent with previous reports of  
151 MYB-induced gene repression <sup>35</sup>. Notably, the genes affected by MYBMIM treatment exhibited  
152 significant enrichment for direct MYB target genes, as defined by prior studies <sup>2</sup> (Figures 2c &  
153 d). Thus, MYBMIM blocks MYB-dependent leukemogenic gene expression in AML cells.

154 To test the prediction that MYBMIM would suppress the assembly of MYB:CBP co-  
155 activation chromatin complexes, we used specific chromatin factor immunoprecipitation followed  
156 by DNA sequencing (ChIP-seq) to analyze genome-wide distribution of MYB protein complexes  
157 in MV-411 cells treated with MYBMIM. We found that treatment with MYBMIM, but not with its  
158 near-isosteric inactive TG3 analogue or untreated control, led to the elimination of 2,690 MYB

159 complexes bound to promoters and enhancers (Figure 3a, Supplementary Data S1). Of the total  
160 5,122 MYB protein complex-bound loci, 587 were found to occur within 50 kb of the 1,730  
161 significantly downregulated genes observed in coupled transcriptome analyses (Supplementary  
162 Figure 2). In addition, we found that MYB-bound promoters and enhancers, specifically affected  
163 by MYBMIM treatment as compared to TG3 or untreated controls, were significantly enriched for  
164 DNA sequence motifs corresponding to MYB, ERG, SPI1/PU.1, CEBPA, and RUNX1  
165 transcription factors (Supplementary Figure 3, Supplementary Table 2). This suggests that their  
166 DNA binding may cooperate with MYB and/or CBP/P300, as suggested by prior studies<sup>16</sup>.

167 A key mechanism of CBP/P300 co-activation involves its acetylation of K27 of histone 3  
168 (H3K27Ac), which facilitates gene trans-activation<sup>34,36</sup>. To examine the effects of MYBMIM on  
169 CBP/P300-associated histone acetylation, we analyzed H3K27Ac genome-wide using ChIP-seq  
170 methods and noted a significant reduction in MYB-containing H3K27Ac sites by MYBMIM  
171 treatment as compared to TG3 control (52% reduction,  $p=0.0032$ , median fold change). This  
172 difference was in spite of the genome-wide reduction in all H3K27Ac sites (33% reduction,  
173  $p=0.034$ ). There were a total of 1,479 sites with significantly decreased H3K27Ac enrichment  
174 (Figure 3b). We then focused on the enhancer at the *BCL2* locus, where we observed  
175 significant reduction of both MYB binding and H3K27 acetylation by MYBMIM treatment, as  
176 compared to untreated cells or cells treated with the inactive TG3 analogue (Figure 3c-f). Using  
177 chromatin immunoprecipitation followed by quantitative genomic PCR (ChIP-qPCR), we  
178 observed a significant albeit incomplete reduction of H3K27Ac at the MYBMIM-displaced *BCL2*  
179 enhancer in cells treated with MYBMIM as compared to TG3 or untreated control ( $p = 8.6e-3$ , t-  
180 test, Figure 3g), as well as other known MYB target genes, such as *GFI1* (Supplementary  
181 Figure 4). Thus, MYBMIM suppresses transcriptional enhancers and activation in AML cells.

182



183 **MYBMIM induces apoptosis of AML cells *in vitro***

184 As AML cells require MYB:CBP/P300-dependent gene expression for growth and  
185 survival, we reasoned that MYBMIM should exhibit growth suppressive effects on AML cells.  
186 Using MYBMIM doses similar to the binding affinities using direct biochemical assays (Figure  
187 1c), we treated a panel of AML cell lines with MYBMIM, including those with (MOLM-13 and  
188 MV-411) and without *MLL* rearrangements (ML-2 and HL-60). We observed that MYBMIM, but  
189 not its inactive congeners TG1, TG2, or TG3, induced sustained, logarithmic reduction of growth  
190 of AML cell lines when compared to untreated control ( $p = 7.2e-7$  for MOLM-13;  $p = 9e-6$  for  
191 MV-411,  $p = 1.7e-6$  for ML-2,  $p = 3.3e-6$  for HL-60, t-test, Figure 3a). No significant differences  
192 in cell growth or viability were observed upon treatment with L-amino acid containing peptides,  
193 consistent with their expected proteolysis in cells and media <sup>37</sup> (Supplementary Figure 5). We  
194 did not observe significant changes in the morphologic differentiation of MYBMIM-treated cells  
195 (Figure 3b), with no significant changes in monocytic CD14, granulocytic CD66b, and monocytic  
196 CD11b expression, as measured by flow cytometry (Supplementary Figure 6). On the other  
197 hand, MYBMIM treatment induced significant apoptosis, as assessed by cell surface annexin V  
198 and intracellular caspase 3 cleavage by flow cytometry ( $p = 5.4e-3$ , t-test, Figure 3c,  
199 Supplementary Figure 7). Since MYBMIM treatment induced apoptosis and downregulated  
200 *BCL2*, we reasoned that downregulation of *BCL2* expression may be in part but not entirely  
201 responsible for the apoptotic effects of MYBMIM on AML cells. We used quantitative reverse  
202 transcriptase-polymerase chain reaction (qRT-PCR) to confirm that *BCL2* expression was  
203 significantly downregulated by more than two-fold by MYBMIM, but not TG3 or mock treatment  
204 in MV-411 and MOLM-13 cells ( $p = 4.6e-3$  and  $p = 8.2e-4$  for *BCL2* and *MYC*, respectively,  
205 Figure 3d, Supplementary Figure 8) and confirmed a decrease in protein abundance of BCL2  
206 with MYBMIM treatment (Supplementary Figure 9). To determine if *BCL2* downregulation is  
207 necessary for MYBMIM-induced apoptosis of AML cells, we expressed *BCL2* using MSCV-

208 IRES-GFP (MIG) retrovirus in MV-411 cells, and confirmed its ectopic overexpression using  
209 qRT-PCR (Supplementary Figure 10). Consistently, MYBMIM, but not its inactive TG3  
210 analogue, induced significant reduction of cell growth and survival of mock-treated and MIG  
211 empty vector control transduced MV-411 cells ( $p = 0.003$ , Figure 3e). In contrast, cells  
212 ectopically-overexpressing *BCL2* were largely, though not completely, rescued from MYBMIM-  
213 induced apoptosis (Figure 3e). Although we cannot exclude the possibility of as of yet unknown  
214 cellular factors or components displaced by MYBMIM from the MYB:CBP/P300 complex, the  
215 disassembly of this complex does appear to contribute to MYBMIM-induced apoptosis. Thus,  
216 MYBMIM impairs AML cells growth and survival *in vitro*, at least in part by downregulating anti-  
217 apoptotic *BCL2* gene expression.

218

#### 219 **MYBMIM impedes human leukemia progression in mouse xenograft models *in vivo***

220 To investigate the potential of MYBMIM for leukemia therapy, first we analyzed the  
221 effects of MYBMIM on the proliferation and differentiation of healthy human umbilical cord blood  
222 (HUCB) hematopoietic progenitor cells *in vitro* and mouse hematopoiesis *in vivo*. We isolated  
223 CD34<sup>+</sup> mononuclear HUCB cells, and assessed their self-renewal and multi-lineage  
224 differentiation using clonogenic assays in methylcellulose *in vitro*<sup>38</sup>. We observed no significant  
225 effects on granulocyte/macrophage and erythroid progenitors, as assessed by their morphology  
226 and clonogenicity (Figures 4a and 4b). Likewise, we observed no significant changes in  
227 peripheral blood counts of C57BL/6J mice treated with MYBMIM by daily intra-peritoneal (IP)  
228 injection for 7 days, as measured by the analysis of total leukocytes, lymphocytes, platelets, and  
229 blood hemoglobin (Figures 4c-f). Thus, transient MYBMIM exposure is compatible with normal  
230 hematopoiesis. To assess the pharmacokinetics of MYBMIM, C57BL/6J mice were treated with  
231 a single dose of 25 mg/kg BIO-MYBMIM by IP injection, and plasma was analyzed for BIO-  
232 MYBMIM at varying time points post-injection. The concentration of BIO-MYBMIM was

233 measured by spectrophotometric avidin assay, and results showed biphasic elimination, with  
234 peak peptide levels being reached by 30 min post-injection followed by a second slow  
235 elimination phase (Figure 4g). These results led us to a dosing regimen of 25 mg/kg twice daily  
236 for *in vivo* studies.

237 To investigate the anti-leukemia efficacy of MYBMIM, we engrafted sublethally-irradiated  
238 NOD-scid IL2R $\gamma$ null (NSG) mice with primary patient-derived MLL-rearranged human leukemia  
239 cells, with their detailed characterization described in Supplementary Table 3, and determined  
240 leukemia development using peripheral blood flow cytometry for human-specific CD45 (hCD45).  
241 Moribund mice were sacrificed, and human leukemia cells were transplanted for propagation  
242 and therapeutic studies using two different treatment paradigms: i) mice with high burden of  
243 leukemia and circulating leukemia cells, and ii) mice with residual disease. First, upon leukemia  
244 development in tertiary recipients, as defined by greater than 1% hCD45-positive cells  
245 circulating in peripheral blood, mice were randomized to receive intraperitoneal MYBMIM (25  
246 mg/kg twice daily) or vehicle control daily for 21 days. At the completion of treatment, MYBMIM-  
247 treated mice exhibited a significant reduction in leukemia burden, as assessed by bone marrow  
248 analysis of human leukemia cells ( $p = 1.2e-4$ , log-transformed  $t$ -test, Figures 4h-i). We  
249 assessed levels of BCL2 in the residual leukemia cells in the bone marrow using quantitative  
250 immunofluorescence, and found that MYBMIM-treated mice exhibited minimal reduction of  
251 levels of BCL2 as compared to vehicle treated mice, without reaching statistical significance ( $p$   
252 = 0.3, log-transformed  $t$ -test, Figure 4j-k). In an independent experiment, we transplanted NSG  
253 mice with primary MLL-rearranged human leukemia cells, and treated engrafted animals 3 days  
254 post-transplantation with intraperitoneal MYBMIM (25 mg/kg twice daily) or vehicle control for 14  
255 days. Mice were subsequently followed for the development of overt leukemia and survival. We  
256 observed that MYBMIM treatment significantly delayed leukemia progression and extended  
257 survival ( $p = 3.8e-3$ , log-rank, Figure 4l) without causing significant weight loss (Supplementary

258 Table 5). Consistent with the function of MYB in leukemia stem cell maintenance, leukemia cells  
259 obtained from moribund mice treated with MYBMIM as compared to vehicle control, exhibited  
260 significantly delayed disease latency in secondary transplant recipients ( $p < 0.0001$ , log-rank,  
261 Figure 4m). Thus, MYBMIM exhibits therapeutic anti-leukemia efficacy in preclinical AML mouse  
262 models *in vivo*.

263

## 264 Discussion

265

266 Transcriptional co-activation is increasingly recognized as a fundamental process  
267 controlling physiologic gene expression in normal cell development and its dysregulation in  
268 cancer cells. In particular, acute myeloid leukemias, blood cancers that remain difficult to treat in  
269 spite of intensive combination chemotherapy and stem cell transplantation, are often caused by  
270 mutations of genes encoding factors that regulate gene expression. Similar mechanisms appear  
271 to be dysregulated in a large fraction of human cancers, at least in part due to the convergence  
272 of developmental and oncogenic gene expression in cell fate specification and development<sup>39</sup>.  
273 As such, lineage specific transcription factors including MYB and their co-activators such as  
274 CBP/P300 are emerging as important targets for drug development.

275 Therapeutic targeting of transcription factors remains challenging due to the absence of  
276 identifiable enzymatic activities and limited knowledge regarding functionally important protein-  
277 protein interaction interfaces amenable to pharmacologic perturbation. Recent efforts have  
278 begun to develop pharmacologic approaches for their blockade, including chetomin and naphthol  
279 derivatives<sup>40-42</sup>. In addition, proof-of-concept small-molecule inhibitors of bromo and  
280 acetyltransferase domains of CBP/P300 have been developed<sup>19,43,44</sup>. Finally, advances in cell  
281 transduction technology and structural biology of protein complexes have been used to design

282 cell-penetrant peptidomimetic molecules to interfere with functionally important protein-protein  
283 interactions, including their therapeutic targeting in cancer<sup>31,45,46</sup>.

284 Here, we introduce an alternative approach to interfere with the activity of transcription  
285 factors and their aberrant co-activation in cancer by disrupting the interaction of the  
286 transactivation domain of MYB with the KIX domain of its coactivator CBP/P300. Molecular  
287 mimicry of helical domains by D-amino acid-containing retro-inverso peptides and their fusion to  
288 cationic peptides have been used to confer protease resistance and membrane penetration,  
289 respectively<sup>25</sup>. We found that our prototypic inhibitor MYBMIM achieves comparable binding  
290 affinity to the native MYB:CBP/P300, and directly binds to the KIX domain of CBP *in vitro* and in  
291 AML cells (Figure 1c). This leads to the disassembly of the cellular MYB:CBP/P300 complex  
292 (Figure 1e-f), associated with the elimination of MYB complexes from enhancers and promoters  
293 (Figure 2a-b), and downregulation of MYB-dependent gene expression in AML cells (Figure 2d-  
294 g). The observed activity of MYBMIM in cells can be rationalized by its accumulation in leukemia  
295 cell nuclei, where it can compete with otherwise relatively low ( $\mu$ M) affinity, cooperative protein-  
296 protein interactions (Figure 1d). Ectopic overexpression of *BCL2* partially rescues MYBMIM-  
297 induced apoptosis of AML cells, consistent with the essential function of MYB-induced  
298 transactivation of enhancers required for enhanced AML cell growth and survival (Figure 3e).  
299 Correspondingly, transient MYBMIM treatment of primary patient-derived AML cells impedes  
300 their growth in two different preclinical models *in vivo* (Figure 4h-m). Thus, MYBMIM offers a  
301 pharmacologic strategy to block leukemogenic transcriptional coactivation as a therapy for AML  
302 and other human cancers with aberrant MYB or CBP/P300 activities.

303 While CBP and P300 are nearly identical in structure, they have distinct and non-  
304 redundant functions<sup>47</sup>. Indeed, recent study of CBP and P300 in *Nup98-Hoxd13*-induced  
305 leukemogenesis found that loss of *p300*, but not *Cbp*, contributes to leukemogenesis<sup>48</sup>.  
306 Conversely, *Cbp* and *p300* were cooperatively required for leukemogenesis induced by *Nup98*-

307 *Hoxa9* and *Moz-Tif2* oncogenes<sup>13</sup>. Importantly, at least for AML1-ETO-induced leukemias, its  
308 leukemogenicity is in part dependent on the acetylation of AML1-ETO by CBP/P300<sup>49</sup>. In  
309 addition, loss-of-function mutations of CBP are present in a variety of human cancers, and  
310 recent work found a functional requirement for P300 in these CBP-deficient tumors<sup>50</sup>. Insofar as  
311 MYBMIM may affect the activities of the KIX domains of both CBP and P300, it is possible that  
312 MYBMIM and its drug-like derivatives may be of therapeutic utility in CBP-deficient cancers.

313 The KIX domain of CBP/P300 recognizes a variety of protein interactors, including MYB,  
314 CREB, JUN, and MLL1, which bind to it with varying affinities and partially overlapping  
315 interaction surfaces, presumably leading to dynamically regulated and partially competitive  
316 transcription factor assemblies<sup>51</sup>. Given the shared physical properties of the interaction of  
317 transactivation domains of various transcription factors with the KIX domains of TAF9, MED15,  
318 and CBP/P300<sup>52</sup>, we anticipate that similar design strategies used for MYBMIM will be useful  
319 for the modulation of their assembly for biological and therapeutic purposes. Even though  
320 binding affinity of MYB:CBP/P300 in a purified reconstituted interaction *in vitro* is on the  $\mu\text{M}$   
321 scale, its observed effects in cells are presumably due to the TAT-directed nuclear accumulation  
322 of MYBMIM, where its extended residence time is expected to achieve specific competition of  
323 the endogenous MYB:CBP/P300 complexes. While MYBMIM exhibits specific effects on the  
324 binding and activity of MYB:CBP/P300 complex in AML cells, it is also possible that its effects  
325 may affect MLL1 and CREB interactions with CBP/P300<sup>53,54</sup>. Thus, MYBMIM offers a probe for  
326 the study of CBP/P300 KIX domain function and its therapeutic targeting in cancer.

327 We found that MYBMIM downregulated the MYB-bound *BCL2* enhancer, leading to  
328 downregulation of *BCL2* expression and apoptosis of leukemia cells. Insofar as this effect can  
329 be partially rescued by ectopic *BCL2* overexpression, this indicates that MYB-induced  
330 dysregulation of *BCL2* expression is required for MYBMIM-induced anti-leukemia effects. It is  
331 likely that altered expression of additional genes, dysregulated by leukemogenic activities of

332 MYB, such as *GFI1* for example <sup>12,55</sup>, may also contribute to the apparent anti-leukemic efficacy  
333 of MYBMIM. In addition, we observed that MYBMIM treatment affected enhancers and  
334 promoters enriched not only for MYB binding sites, but also for several other transcription  
335 factors, including ERG, SPI1/PU.1, CEBPA, and RUNX1 (Figure 2). Insofar as at least some of  
336 these transcription factors can co-assemble at specific gene loci and can themselves be  
337 acetylated by CBP/P300 <sup>16,49</sup>, our findings indicate that leukemogenic transcriptional co-  
338 activation in AML may be directly related to the aberrant assembly and composition of  
339 enhanceosomes at specific gene loci. Their definition is anticipated to yield specific molecular  
340 dependencies for therapeutic modulation of aberrant transcriptional co-activation in cancer.

341

## 342 **Methods**

343

## 344 **Reagents**

345 All reagents were obtained from Thermo Fisher unless otherwise specified. Synthetic  
346 peptides were produced by solid phase synthesis, purified by liquid chromatography, and  
347 confirmed by mass spectrometry (Tufts University Core Facility). Synthetic oligonucleotides  
348 were obtained from Eurofins. Peptides were dissolved in phosphate buffered saline at a  
349 concentration of 1 mM, as measured using optical absorbance measurements at 280 nm and  
350 extinction coefficient  $1490 \text{ M}^{-1}\text{cm}^{-1}$ .

351

## 352 **Plasmids**

353 Bacterial expression pGEX-KIX vector encoding the KIX domain of CBP was a kind gift  
354 of Shunsuke Ishii <sup>56</sup>. MSCV-IRES-GFP retroviral vector encoding human *BCL2* was a gift from  
355 the Takaomi Sanda <sup>57</sup>.

356

## 357 **Cell culture**

358           The human AML lines MV-411, MOLM-13, ML-2, and HL-60 were obtained from the  
359 American Type Culture Collection (ATCC, Manassas, Virginia, USA). Umbilical cord blood was  
360 obtained from the New York Blood Center. The identity of all cell lines was verified by STR  
361 analysis (Genetica DNA Laboratories, Burlington, NC, USA) and absence of Mycoplasma sp.  
362 contamination was determined using Lonza MycoAlert (Lonza Walkersville, Inc., Walkersville,  
363 MD, USA). Cell lines were cultured in 5% CO<sub>2</sub> in a humidified atmosphere at 37 °C in RPMI  
364 medium supplemented with 10 % fetal bovine serum (FBS) and antibiotics (100 U / ml penicillin  
365 and 100 µg / ml streptomycin).

366

## 367 **Molecular dynamics simulations**

368           The solution NMR structure of KIX domain of CBP bound to the transactivation domain  
369 of C-MYB (PDB code 1SB0) was used a starting point for simulations of both L- and D-amino  
370 acid MYB-CBP complexes<sup>1</sup>. Specifically, the NMR structure with the lowest root-mean-square-  
371 deviation (RMSD) from the average of the ensemble of 20 solution NMR structures was  
372 selected (model 5). D-amino acid MYB peptide was built with Simulaid program using the NMR  
373 structure of protein-peptide complex and converting C-MYB peptide from L-amino acids to D-  
374 amino acids in the presence of CBP<sup>58</sup>. Simulations were performed using the Desmond  
375 molecular dynamics program<sup>59</sup>. The starting structures were solvated with 6615 and 6714 SPC  
376 water molecules, respectively, with a 5 Å buffer of water in a rectangular box. Three chloride  
377 ions were added to both systems to maintain electric neutrality. The OPLS3 force field was used  
378 to describe both L- and D-amino acid peptide-protein complexes<sup>60</sup>. For each system, a  
379 relaxation phase, with a combination of Brownian dynamics and restrained molecular dynamics



380 phases was performed to equilibrate the systems. Periodic boundary conditions with a cutoff of  
381 0.9 nm for both particle-mesh Ewald and Lennard-Jones interactions were used<sup>61,62</sup>. Each  
382 equilibrated system was then subjected to 60 ns simulations with identical parameters.  
383 Simulations were performed using the constant pressure and constant temperature (NPT)  
384 ensemble with a Berendsen thermostat and barostat. The equations of motion were integrated  
385 using RESPA with a time step of 2.0 fs for bonded and short-range non-bonded interactions,  
386 and 6.0 fs for long-range electrostatic interactions<sup>63</sup>. System coordinates were saved every 5  
387 ps.

388

389

### 390 **Expression and purification of recombinant CBP KIX domain**

391 BL21(DE3) cells (Invitrogen) transformed with pGEX-KIX plasmid were induced at 37° C  
392 with isopropyl  $\beta$ -D-1-thiogalactopyranoside for 3 hours. Cells were lysed in 50 mM Tris-HCl pH  
393 7.3, 150 mM NaCl, 0.1% Tween-20, 1mM DTT, 5 mM EDTA, supplemented with protease  
394 inhibitors described above and sonicated for ten minutes (15 sec on, 15 sec off, 40% amplitude)  
395 using the Misonix probe sonicator (Qsonica, Newtown, CT). Lysate was cleared by  
396 centrifugation for 1 h at 21,800 x g at 4° C. Cleared lysate was incubated with 4 mL glutathione  
397 agarose resin slurry (GoldBio) for 1 h at 4° C to capture GST-KIX. Resin was washed four times  
398 with 50 mM Tris-HCl pH 7.4, 150 mM NaCl. KIX domain was cleaved from GST by incubation of  
399 resin-bound GST-KIX with 160 U thrombin (GE Healthcare) overnight at room temperature.  
400 Resin was centrifuged at 500 x g for 5 min. Supernatant containing cleaved KIX was collected  
401 and dialyzed at 4° C against 50 mM MOPS pH 6.5, 50 mM NaCl, 10% glycerol, 1  $\mu$ M tris-2-  
402 carboxyethylphosphine. Cleaved KIX was purified using a linear gradient of 50 mM to 1 M NaCl  
403 by cation exchange chromatography using MonoS 5/50 GL column (GE Healthcare). Fractions

404 containing purified KIX were dialyzed against 50 mM potassium phosphate pH 5.5, 150 mM  
405 NaCl, 10  $\mu$ M tris-2-carboxyethylphosphine, 30% glycerol, and stored at -80° C.

406

407

#### 408 **Microscale thermophoresis (MST)**

409 Binding of purified recombinant KIX with FITC-conjugated peptides was measured using  
410 Monolith NT.115 (NanoTemper Technologies). Assays were conducted in 50 mM sodium  
411 phosphate, 150 mM NaCl, 0.01% NP-40, pH 5.5. FITC-conjugated peptides (FITC-MYB at 250  
412 nM, FITC-MYBMIM at 500 nM, FITC-TAT at 500 nM, FITC-TG1 at 500 nm, FITC-TG2 at 500  
413 nm, and FITC-TG3 at 500 nm) were mixed with 16 increasing concentrations of KIX (0.0015 to  
414 50  $\mu$ M, 1:1 serial dilutions) and loaded into MST Premium Coated capillaries. MST  
415 measurements were recorded at room temperature for 10 sec per capillary using fixed IR-laser  
416 power of 80% and LED excitation power of 40-50%.

417

#### 418 **Confocal microscopy**

419 Confocal imaging was performed using the Zeiss LSM880 confocal microscope and 40X  
420 objective with 1.5  $\mu$ m z-stack images. Cells were applied to a poly-L-lysine-coated chambered  
421 Nunc Lab-tek II coverslip and incubated for 2 hours at 37° C. FITC-conjugated MYBMIM was  
422 added to cell suspensions at a concentration of 50 nM and incubated for 1 hour at 37° C. Cells  
423 were counter-stained using Hoechst 33342 and Mitotracker Red CMX ROS (MProbes) for 10  
424 minutes at a final dilution of 1:10,000 prior to imaging.

425

#### 426 **Western blot analysis**

427 Cells were lysed in RIPA buffer (Thermo Fisher) supplemented with a protease inhibitor  
428 mix comprised of AEBSF (0.5 mM concentration, Santa Cruz, SC-202041B), Bestatin (0.01 mM,  
429 Fisher/Alfa Aesar, J61106-MD), Leupeptin (0.1 mM, Santa Cruz, SC-295358B), and Pepstatin  
430 (0.001 mM, Santa Cruz, SC-45036A). Lysates were mechanically disrupted using Covaris S220  
431 adaptive focused sonicator, according to the manufacturer's instructions (Covaris, Woburn, CA).  
432 Lysates were cleared by centrifugation for 15 min at 18,000 x g and clarified lysates were  
433 quantified using the bicinchoninic acid assay (Pierce). Clarified lysates (20 µg of protein) were  
434 resolved using sodium dodecyl sulfate-polyacrylamide gel electrophoresis, and electroeluted  
435 using the Immobilon FL PVDF membranes (Millipore, Billerica, MA, USA). Membranes were  
436 blocked using the Odyssey Blocking buffer (Li-Cor, Lincoln, Nebraska, USA). The following  
437 primary antibodies were used as indicated: anti-MYB (1:1000, 05-175, Millipore), anti-CBP  
438 (1:1000, PA1-847, Invitrogen), anti-BCL2 (1:1000, 200-401-222, Rockland), anti-β actin (1:1000,  
439 8H10D10, Cell Signaling). Anti-CBP antibody is known to cross-react with P300<sup>64</sup>. Blotted  
440 membranes were visualized using secondary antibodies conjugated to IRDye 800CW or IRDye  
441 680RD (Goat anti-rabbit, 1:15,000, and goat anti-mouse, 1:15,000) and the Odyssey CLx  
442 fluorescence scanner, according to manufacturer's instructions (Li-Cor, Lincoln, Nebraska,  
443 USA).

444

#### 445 **Co-immunoprecipitation analysis**

446 7.5 µg of anti-MYB antibodies (EP769Y, Abcam) were conjugated to 1 mg M-270 Epoxy-  
447 coated magnetic beads (Invitrogen) according to manufacturer's instructions.  $2 \times 10^7$  MV-411  
448 cells were collected and washed in cold PBS. Washed cell pellets were resuspended in 2 mL  
449 cold lysis buffer (50 mM Tris-HCl pH 7.4, 150 mM NaCl, 0.5 mM EDTA, 1 mM DTT, 0.5% Triton  
450 X-100, 10% glycerol supplemented with protease inhibitors described above) and incubated on  
451 ice for 10 min. Cells centrifuged for 5 min at 2,000 x g at 4° C. Supernatant was clarified by  
452 centrifugation for 15 min at 18,000 x g at 4° C. Cleared lysate was added to 1 mg beads, and

453 MYBMIM was added to a final concentration of 20  $\mu$ M. Immunoprecipitation proceeded for 3 h at  
454 4° C with rotation. Beads were washed with 1 mL cold lysis buffer twice. Proteins were eluted in  
455 30  $\mu$ L EB buffer (Invitrogen) for 5 min at room temperature with agitation, and eluate was  
456 neutralized with 2  $\mu$ L 1M Tris pH 11. Samples were prepared for Western blot by addition of  
457 Laemmli buffer with 50 mM DTT and incubation at 95° C for 5 min. Presence of MYB and  
458 CBP/P300 was identified by Western blot as described.

459

### 460 **Streptavidin affinity purification**

461 Streptavidin magnetic beads (Pierce) were washed with PBS with 0.5% BSA twice prior  
462 to use. Biotinylated MYBMIM (BIO-MYBMIM) was conjugated to 100  $\mu$ L streptavidin bead slurry  
463 (1.5 mg beads, binding capacity 3500 pmol biotinylated fluorescein per mg) by incubation at  
464 room temperature for 1 h in 1 mL PBS with 0.5%. Peptide-conjugated beads were washed twice  
465 in 1 mL PBS with 0.5% BSA.  $1 \times 10^7$  cells were collected and washed in cold PBS. Washed cell  
466 pellets were resuspended in 1 mL of cold lysis buffer (50 mM Tris-HCl pH 7.4, 150 mM NaCl,  
467 0.5 mM EDTA, 1 mM DTT, 0.5% Triton X-100, 10% glycerol supplemented with protease  
468 inhibitors described above) and incubated on ice for 10 min. Cells were centrifuged for 5 min at  
469 2,000 x g at 4° C. Supernatant was clarified by centrifugation for 15 min at 18,000 x g at 4° C.  
470 PBS with 0.5% BSA was removed from peptide-conjugated streptavidin bead slurry, lysate was  
471 added to 1 mg beads, and affinity purification proceeded for 3 h at 4° C. For peptide  
472 competition, MYBMIM or RI-TAT was added at 20-fold molar excess at the time of affinity  
473 purification. Beads were washed twice with 1 mL cold lysis buffer. Bound proteins were eluted  
474 by adding 40  $\mu$ L Laemmli buffer with 50 mM DTT and incubated for 5 min at 95° C. Presence  
475 of CBP/P300 was identified by Western blot as described.

476

### 477 **Chromatin immunoprecipitation and sequencing (ChIP-seq)**

478           ChIP was performed as previously described<sup>65</sup>. Briefly, cells were fixed in 1% formalin in  
479 phosphate-buffered saline (PBS) for 10 minutes at room temperature. Glycine (125 mM final  
480 concentration) and Tris-HCl pH 8 (100 mM final concentration) were added to the cells and cells  
481 were washed twice in ice-cold PBS and resuspended in sodium dodecyl sulfate (SDS) lysis  
482 buffer (1% SDS, 10 mM EDTA, 50 mM Tris-HCl, pH 8.1). Lysates were sonicated using the  
483 Covaris S220 adaptive focused sonicator to obtain 100-500 bp chromatin fragments (Covaris,  
484 Woburn, CA). Lysates containing sheared chromatin fragments were resuspended in 0.01 %  
485 SDS, 1.1 % Triton-X100, 1.2 mM EDTA, 16.7 mM Tris-HCl, pH 8.1, 167 mM NaCl. Lysates and  
486 antibody-coupled beads were incubated over night at 4 °C. Precipitates were washed  
487 sequentially with Mixed Micelle Wash Buffer (15ml 5M NaCl -150mM Final, 10ml 1M Tris-Cl pH  
488 8.1, 5ml 0.5M EDTA, pH 8.0, 40ml 65% w/v sucrose, 1ml 10% NaN<sub>3</sub>, 25ml 20% Triton X-100,  
489 10ml 10% SDS, Add dH<sub>2</sub>O to 500 ml), LiCl washing solution (0.5% deoxycholic acid, 1mM  
490 EDTA, 250mM LiCl, 0.5% NP-40, 10mM Tris-Cl pH 8.0, 0.2% NaN<sub>3</sub>) and then TBS buffer  
491 (20mM Tris-Cl pH 7.4, 150mM NaCl). Elution performed in elution buffer (1 % SDS, 0.1 M  
492 NaHCO<sub>3</sub>). ChIP-seq libraries were generated using the NEBNext ChIP-seq library prep kit  
493 following the manufacturer's protocol (New England Biolabs, Ipswich, MA, USA). Libraries were  
494 sequenced on the Illumina HiSeq 2500 instruments, with 30 million 2 x 50 bp paired reads.

495           For ChIP-seq analysis, reads were quality and adapter trimmed using 'trim\_galore'  
496 before aligning to human genome assembly hg19 with bwa mem using the default parameters.  
497 Aligned reads with the same start position and orientation were collapsed to a single read  
498 before subsequent analysis. Density profiles were created by extending each read to the  
499 average library fragment size and then computing density using the BEDTools suite. Enriched  
500 regions were discovered using MACS 2.0 and scored against matched input libraries. Genomic  
501 'blacklisted' regions were filtered  
502 (<http://www.broadinstitute.org/~anshul/projects/encode/rawdata/blacklists/hg19-blacklist->  
503 README.pdf) and remaining peaks within 1kb were merged. Read density normalized by

504 sequencing depth was then calculated for the union of peaks, and the MYBMIM and control  
505 samples were compared using Welch's t-test.

506

### 507 **Chromatin immunoprecipitation and quantitative PCR (ChIP-PCR)**

508 For H3K27Ac ChIP-PCR, MV-411 cells were treated with 20uM MYBMIM or TG3 for 12  
509 hours and then cross-linked with 1% formaldehyde for 10 min at room temperature. Cross-  
510 linking was ended by the addition of 1/20 volume of 2.5M Glycine for 5 min at room temperature  
511 followed by cell lysis and sonication (E220 Covaris sonicator) to obtain 100- to 500-bp  
512 chromatin fragments. H3K27Ac Rabbit polyclonal antibody (Abcam, #4729) was conjugated to  
513 Protein A and G Dynabeads per manufacturer's instructions (Thermo Fischer Scientific).  
514 Lysates were incubated overnight at 4°C with antibody-conjugated beads in suspension.  
515 Precipitates were then washed sequentially with cold washing solution (1% NP-40, 1mM EDTA,  
516 50 mM Hepes-KOH, pH 7.6, 500 mM LiCl, 0.7% Na-Deoxycholate) and then washing solution  
517 (50 mM Tris-HCL, pH 8.0, 10mM EDTA, 50mM NaCl), then eluted in elution buffer (50 mM  
518 Tris-HCL, pH 8.0, 10mM EDTA, 1% SDS). Reversal of crosslinks in elution buffer overnight at  
519 65°C followed by digestion of RNA and protein using RNase (Roche, Catalog No. 111119915-  
520 001) and Proteinase K (Roche, Catalog No. 03115828001). DNA purification was performed  
521 using PureLink PCR Purification Kit per manufacturer's protocol (Invitrogen). RT-qPCR was  
522 performed as described below.

523

### 524 **RNA sequencing (RNA-seq)**

525 Reads were quality and adapter trimmed using 'trim\_galore' before aligning to human  
526 assembly hg19 with STAR v2.5 using the default parameters. Coverage and post-alignment  
527 quality were assessed using the Picard tool CollectRNASeqMetrics

528 (<http://broadinstitute.github.io/picard/>). Read count tables were created using HTSeq v0.6.1.  
529 Normalization and expression dynamics were evaluated with DESeq2 using the default  
530 parameters.

531

### 532 **Cell viability analysis**

533 Cells were resuspended and plated at a concentration of  $2 \times 10^5$  cells in 200  $\mu$ L in 96-well  
534 tissue culture plates. Media with peptides was replaced every 48 hours. To assess the number  
535 of viable cells, cells were resuspended in PBS and 10  $\mu$ L of suspension was mixed in a 1:1 ratio  
536 with 0.4 % Trypan Blue (Thermo Fisher) and counted using a hemacytometer (Hausser  
537 Scientific, Horsham, PA, USA). To assess viability using an ATP-based assay, cell viability was  
538 assessed using the CellTiter-Glo Luminescent Viability assay, according to the manufacturer's  
539 instructions (Promega). Luminescence was recorded using the Infinite M1000Pro plate reader  
540 using integration time of 250 milliseconds (Tecan).

541

### 542 **Flow cytometric analysis of apoptosis**

543 Cells were resuspended to a concentration of  $1 \times 10^6$  cells were plated in triplicate in a 12-  
544 well tissue culture plate. For assessment of annexin V staining, cells were washed with PBS  
545 and then resuspended in PBS with Annexin V-APC (BioLegend) and propidium iodide at a  
546 dilution of 1:1000. For intracellular detection of cleaved caspase 3, cells were fixed and  
547 permeabilized using the BD Cytfix/Cytoperm Fixation/Permeabilization solution according to  
548 the manufacturer's instructions (BD Biosciences). Cells were then stained using the Alexa Fluor  
549 647-conjugated anti-active caspase-3 (BD Biosciences) at a dilution of 1:50. Cells were  
550 incubated for 30 minutes room temperature in the dark, washed, and then analyzed using the  
551 BD LSRFortessa cell analyzer. For assessment of differentiation, cells were stained using the

552 anti-human CD14 PE at a dilution of 1:20 (Affymetrix eBiosciences) and anti-human CD66b at a  
553 dilution of 1:20 (Affymetrix eBiosciences).

554

#### 555 **Giemsa staining of cells for morphology**

556 Cells were resuspended to a concentration of  $1 \times 10^6$  cells in 1 milliliter of PBS. Using the  
557 benchtop Cytospin Centrifuge instrument (ThermoFisher Scientific), 200uL of the cell  
558 suspension was applied white clipped Cytofunnels (ThermoFisher Scientific) to glass  
559 microscope slides ( $2 \times 10^5$  cells/slide). Dip Quick Stain (J-322, Jorgensen Laboratories, Inc) was  
560 used for per manufacturer's protocol for the polychromic stain of cells.

561

#### 562 **Quantitative RT-PCR**

563 RNA was isolated using Trizol reagent according to the manufacturer's instructions (Life  
564 Technologies). Complementary DNA was synthesized using the SuperScript III First-Strand  
565 Synthesis system according to the manufacturer's instructions (Invitrogen). Quantitative real-  
566 time PCR was performed using the KAPA SYBR FAST PCR polymerase with 20 ng template  
567 and 200 nM primers, according to the manufacturer's instructions (Kapa Biosystems,  
568 Wilmington, MA, USA). PCR primers are listed in Supplementary Table 4. Ct values were  
569 calculated using ROX normalization using the ViiA 7 software (Applied Biosystems).

570

#### 571 **Retrovirus production and cell transduction**

572 The MIG-BCL2 vector was packaged using pUMVc and pCMV-VSVG vectors in HEK  
573 293T cells and the FuGENE 6 transfection reagent, according to manufacturer's instructions



574 (Promega). Virus supernatant was collected at 48 and 72 hours post-transfection, pooled,  
575 filtered and stored at -80 °C. Cells were transduced with virus particles at a multiplicity of  
576 infection of 1 by spin inoculation for 90 minutes at 3500 rpm at 35° C in the presence of 8 µg/ml  
577 hexadimethrine bromide. Two days after transduction, cells were isolated using fluorescence-  
578 activated cell sorting (FACSAria III, BD Bioscience, San Jose, CA, USA).

579

### 580 **Blood progenitor colony forming assays**

581 Mononuclear cells were isolated from cord blood using Ficoll-Paque PLUS density  
582 centrifugation and enriched for CD34+ cells using the CD34 MicroBead Kit UltraPure, according  
583 to the manufacturer's instructions (Miltenyi Biotech). CD34+ cells were resuspended to a  
584 concentration of  $1 \times 10^5$  cells/mL. Methocult H4034 Optimum (Stemcell Technologies, Catalog no.  
585 04034 with FBS, BSA and recombinant cytokines rhSCF, rhGM-CSF, rhG-CSF, rhIL3, and  
586 rhErythropoietin) semi-solid media was used for the growth of hematopoietic progenitor cells in  
587 colony-forming units. Methocult and CD34+ cells were mixed in a ratio of 1:10 (cells:Methocult)  
588 for a final cell concentration plated of 1000 cells/dish. TG3 or MYBMIM peptide were added to  
589 this solution for a final concentration of 20µM. Mixture was vortexed for 30 seconds and  
590 incubated at room temperature for 5 minutes. Using a blunt end 18G needle, 1.1mL of the  
591 solution was added to a 35x10mm dish and then tilted to cover. Peptide treatment conditions  
592 were plated in biological triplicates. 35x10mm dishes placed into a larger 100x15mm dish with  
593 one 35x10mm dish filled with sterile water). Dishes were incubated at 37°C with 5% CO<sub>2</sub> for 14  
594 days. Both erythroid progenitor and granulocyte-macrophage progenitors were observed and  
595 quantified. Brightfield microscopy CFU-Gm and BFU-E colony images were obtained using 10x  
596 and 20x magnification on the Zeiss Zen observer inverted stand for live imaging.

597

## 598 **Mouse studies**

599 All mouse experiments were carried out in accordance with institutional animal protocols.  
600 For toxicity studies, female C57BL/6J mice (The Jackson Laboratory, Bar Harbor, Maine, USA)  
601 were treated with MYBMIM peptide suspended in PBS and administered daily through  
602 intraperitoneal injection at a daily dose of 25 mg/kg for a total of 7 days. Mice were harvested at  
603 the end of treatment for hematologic, biochemical and histologic analyses. For pharmacokinetic  
604 studies, C57BL/6J mice (The Jackson Laboratory, Bar Harbor, Maine, USA) were treated with a  
605 single IP injection of 25 mg/kg BIO-MYBMIM, and serum was collected 30 minutes, 2 hours, 4  
606 hours, and 24 hours post-injection. Quantification of BIO-MYBMIM was measured using the  
607 Quant-Tag Biotin kit (Vector Labs, cat. # BDK-2000) following the manufacturer instructions.  
608 For patient-derived xenografts, two hundred thousand primary AML MLL-rearranged leukemia  
609 cells were suspended in 200 ml of PBS and transplanted via tail vein injection into 8-week-old  
610 sublethally irradiation (200 rad) female NOD.Cg-Prkdc(scid)Il2rg(tm1Wjl)/SzJ mice (The  
611 Jackson Laboratory, Bar Harbor, Maine, USA). Recipient mice were maintained on antibiotic  
612 supplementation in chow (0.025% trimethoprim, 0.124% sulfamethoxazole, Sulfatrim). Three  
613 days after transplant, mice were randomly assigned to experimental treatment groups. MYBMIM  
614 peptide suspended in PBS was administered twice daily through intraperitoneal injection at a  
615 dose of 25 mg/kg per injection. Mice were treated from days 3-17 of this study for a total of 14  
616 days and then monitored daily with clinical examination for survival analysis.

617

## 618 **Immunofluorescence staining**

619 The immunofluorescence detection was performed with a Discovery XT system  
620 (Ventana Medical Systems). The protocol was established at the Molecular Cytology Core  
621 Facility, MSKCC. The tissue sections were blocked first for 30 min in Mouse IgG Blocking

622 reagent (Vector Labs; cat. # MKB-2213) in PBS. The primary antibody incubation was  
623 performed with either mouse monoclonal Anti Human CD45 (Dako, Catalog No. M0701, 2.5  
624  $\mu\text{g}/\text{mL}$ ) or rabbit polyclonal Anti BCL2 (Ventana, Catalog No. 790-4604, 0.24  $\mu\text{g}/\text{mL}$ ) for 6 hours  
625 followed by 60 minutes incubation with a biotinylated mouse secondary antibody (Vector Labs,  
626 MOM Kit BMK-2202), at 5.75  $\mu\text{g}/\text{mL}$  (1:200 dilution). The detection was performed  
627 with Secondary Antibody Blocker, Blocker D, Streptavidin-HRP D (Ventana Medical Systems),  
628 followed by incubation with Tyramide-Alexa Fluor 488 (Invitrogen, cat. #T20922).

629

### 630 **Data Availability**

631

632 The data discussed in this publication have been deposited in NCBI's Gene Expression  
633 Omnibus and are accessible through GEO Series accession number GSE94242.

634

### 635 **Statistical Analysis**

636 For comparisons between two sample sets, statistical analysis of means was performed  
637 using 2-tailed, unpaired Student's t-tests. Survival analysis was done using the Kaplan-Meier  
638 method, as assessed using a log-rank test. For gene expression analysis, statistical significance  
639 was assessed using paired t-tests.

640 **Acknowledgements**

641 We thank Alejandro Gutierrez, Leo Wang, and Marc Mansour for helpful discussions,  
642 and Antoine Gruet and Yang Li for technical assistance. This work was supported by the NIH  
643 R21 CA188881, R01 CA204396, P30 CA008748, T32 GM073546, Burroughs Wellcome Fund,  
644 Josie Robertson Investigator Program, Rita Allen Foundation, Alex's Lemonade Stand  
645 Foundation, Gabrielle's Angel Foundation, and Mr. William H. and Mrs. Alice Goodwin and the  
646 Commonwealth Foundation for Cancer Research and the Center for Experimental Therapeutics  
647 at MSKCC. A.K. is the Damon Runyon-Richard Lumsden Foundation Clinical Investigator.

648

649 **Author Contributions**

650 K.R. performed experiments, analyzed data and designed study; L.F., F.B, T.G., G.M.,  
651 M.K., A.K., S.A., E.S., E.deS., B.K., R.K. performed experiments and analyzed data; A.K.  
652 analyzed data and designed study. K.R. and A.K. wrote the manuscript with contributions from  
653 other co-authors.

654

655 **Competing Financial Interests**

656 The authors declare no competing financial interests.

657

658

659 **References**  
660  
661

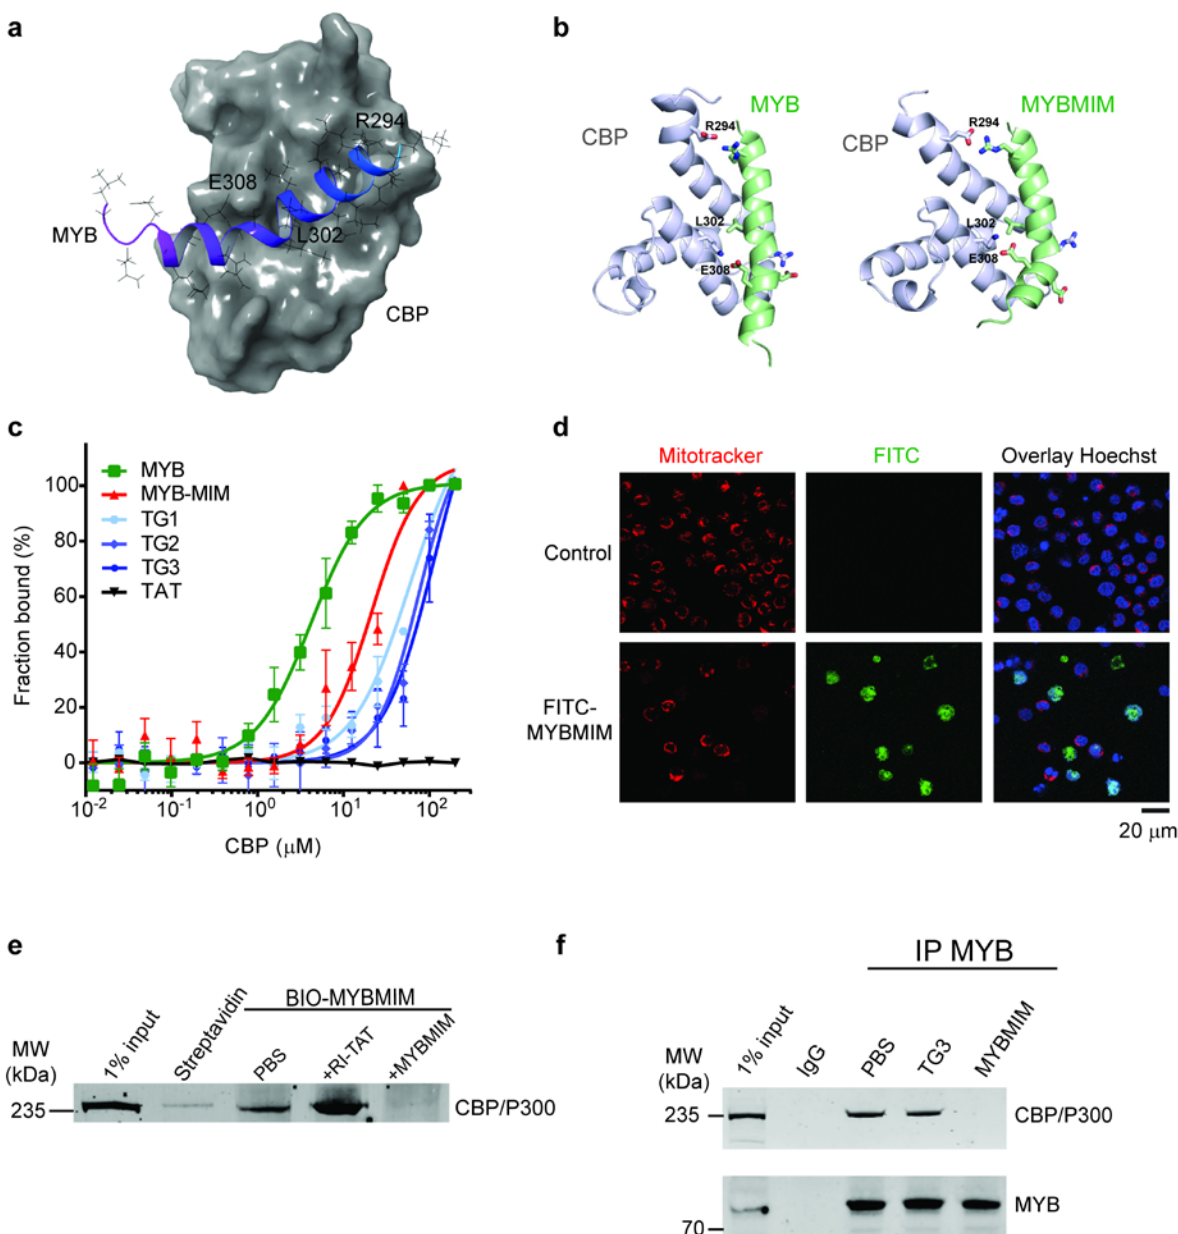

662

**Figure 1. MYBMIM disrupts the MYB:CBP complex in AML cells.** (a) Molecular structure of the complex of the transactivation domain of MYB (blue) with the KIX domain of CBP (gray)<sup>1</sup> assembled in Maestro (Schrödinger). MYB residues making contacts with CBP are labeled as indicated. (PDB: 1SB0). (b) Molecular structures of the transactivation domain of MYB (left, green) and MYBMIM (right) in complex the KIX domain of CBP (gray), as modeled using replica exchange molecular dynamics. Both MYBMIM and MYB retain E308 and R294 salt bridge and L302 hydrophobic interactions, as marked by sidechain representation. (c) Binding of FITC-conjugated MYB (green), MYBMIM (red), compared to control TG1, TG2, TG3 and TAT (black), as measured using microscale thermophoresis ( $K_d = 4.2 \pm 0.5 \mu\text{M}$  and  $21.3 \pm 2.9 \mu\text{M}$  for MYB and MYBMIM, respectively,  $59.2 \pm 12.4 \mu\text{M}$  for TG1,  $75.1 \pm 12.5 \mu\text{M}$  for TG2 and  $113.5 \pm 36.6 \mu\text{M}$  for TG3). Error bars represent standard error mean of three biological replicates. (d) Live cell confocal fluorescence microscopy photographs of MV-411 cells treated with 50 nM FITC-MYBMIM (green) for 1 hour, as visualized using Mitotracker (red) and Hoechst 33342 (blue). Scale bar indicates 20  $\mu\text{m}$ , with z-stack of 1.5  $\mu\text{m}$ . (e) Western blot showing comparable binding of cellular CBP/P300 to streptavidin bead-immobilized BIO-MYBMIM, specifically competed by 20-fold excess free retro-inverso TAT (RI-TAT) and MYBMIM peptides, as indicated by + signs. (f) Representative Western blot of MYB:CBP/P300 complex immunoprecipitated from MV411 cells disrupted MYBMIM, as indicated.

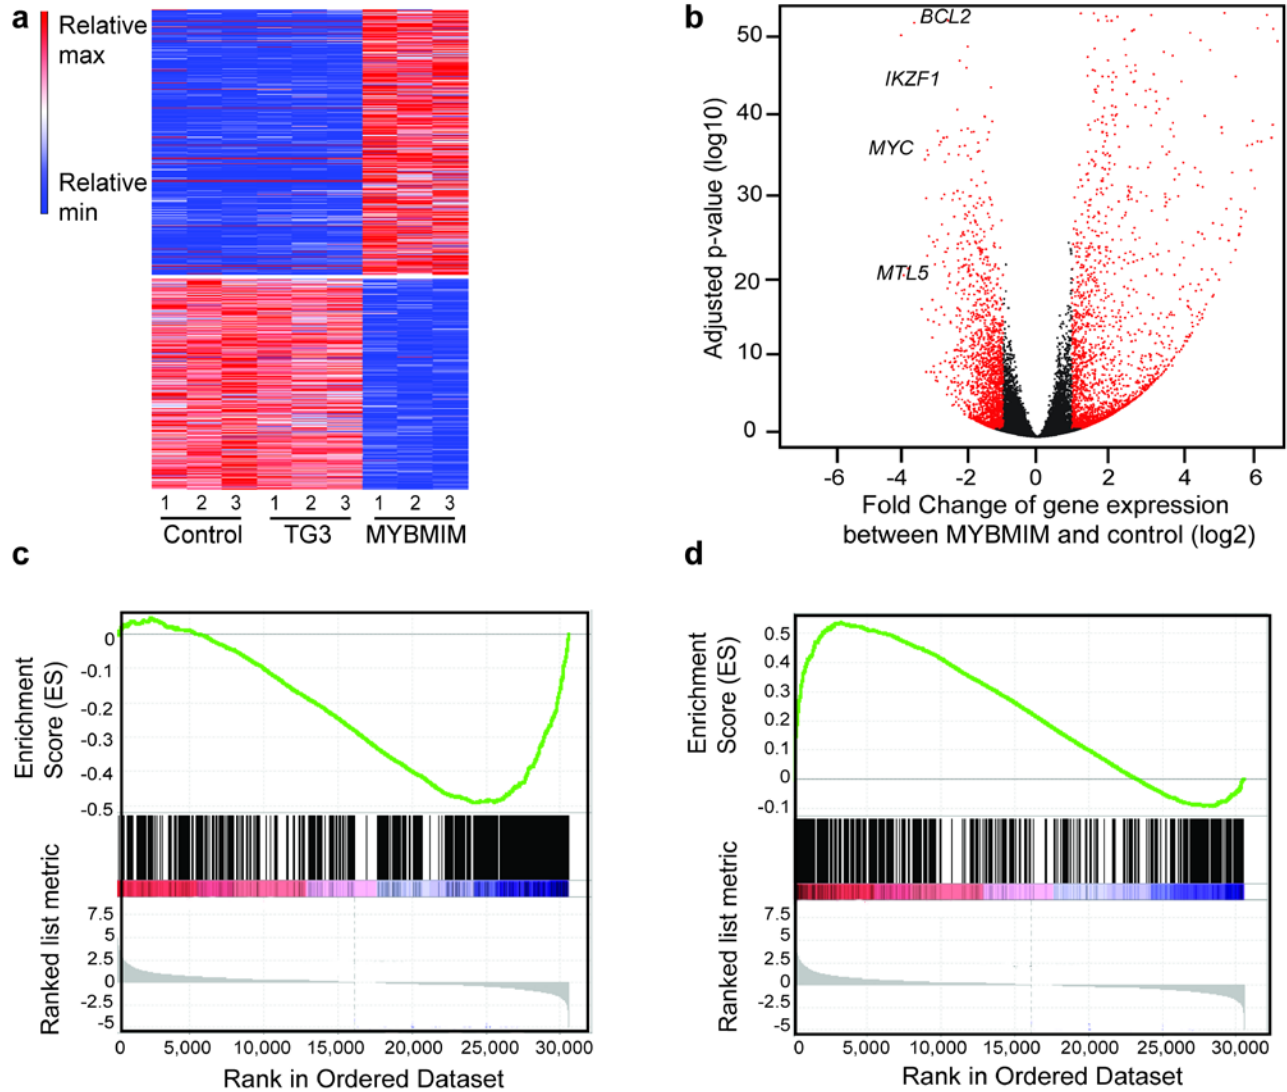

663

**Figure 2. MYBMIM regulates MYB enhancers and promoters and MYB-dependent target genes.** (a) Heatmap of changes in normalized gene expression of MOLM13 cells treated with 20  $\mu$ M MYBMIM versus TG3 control for 6 hours, as analyzed by RNA-seq of three biological replicates. (b) Volcano plot of normalized gene expression, with *BCL2*, *IKZF1*, *MYC* and *MTL5* as indicated. (c-d) Gene set enrichment analysis of downregulated (c) and upregulated (d) genes with respect to MYB target genes, as defined by <sup>2</sup>. NES = -2.47 and 2.09, and  $q = 0$  and  $0$ , respectively.

664

665

666

667

668

669

670

671

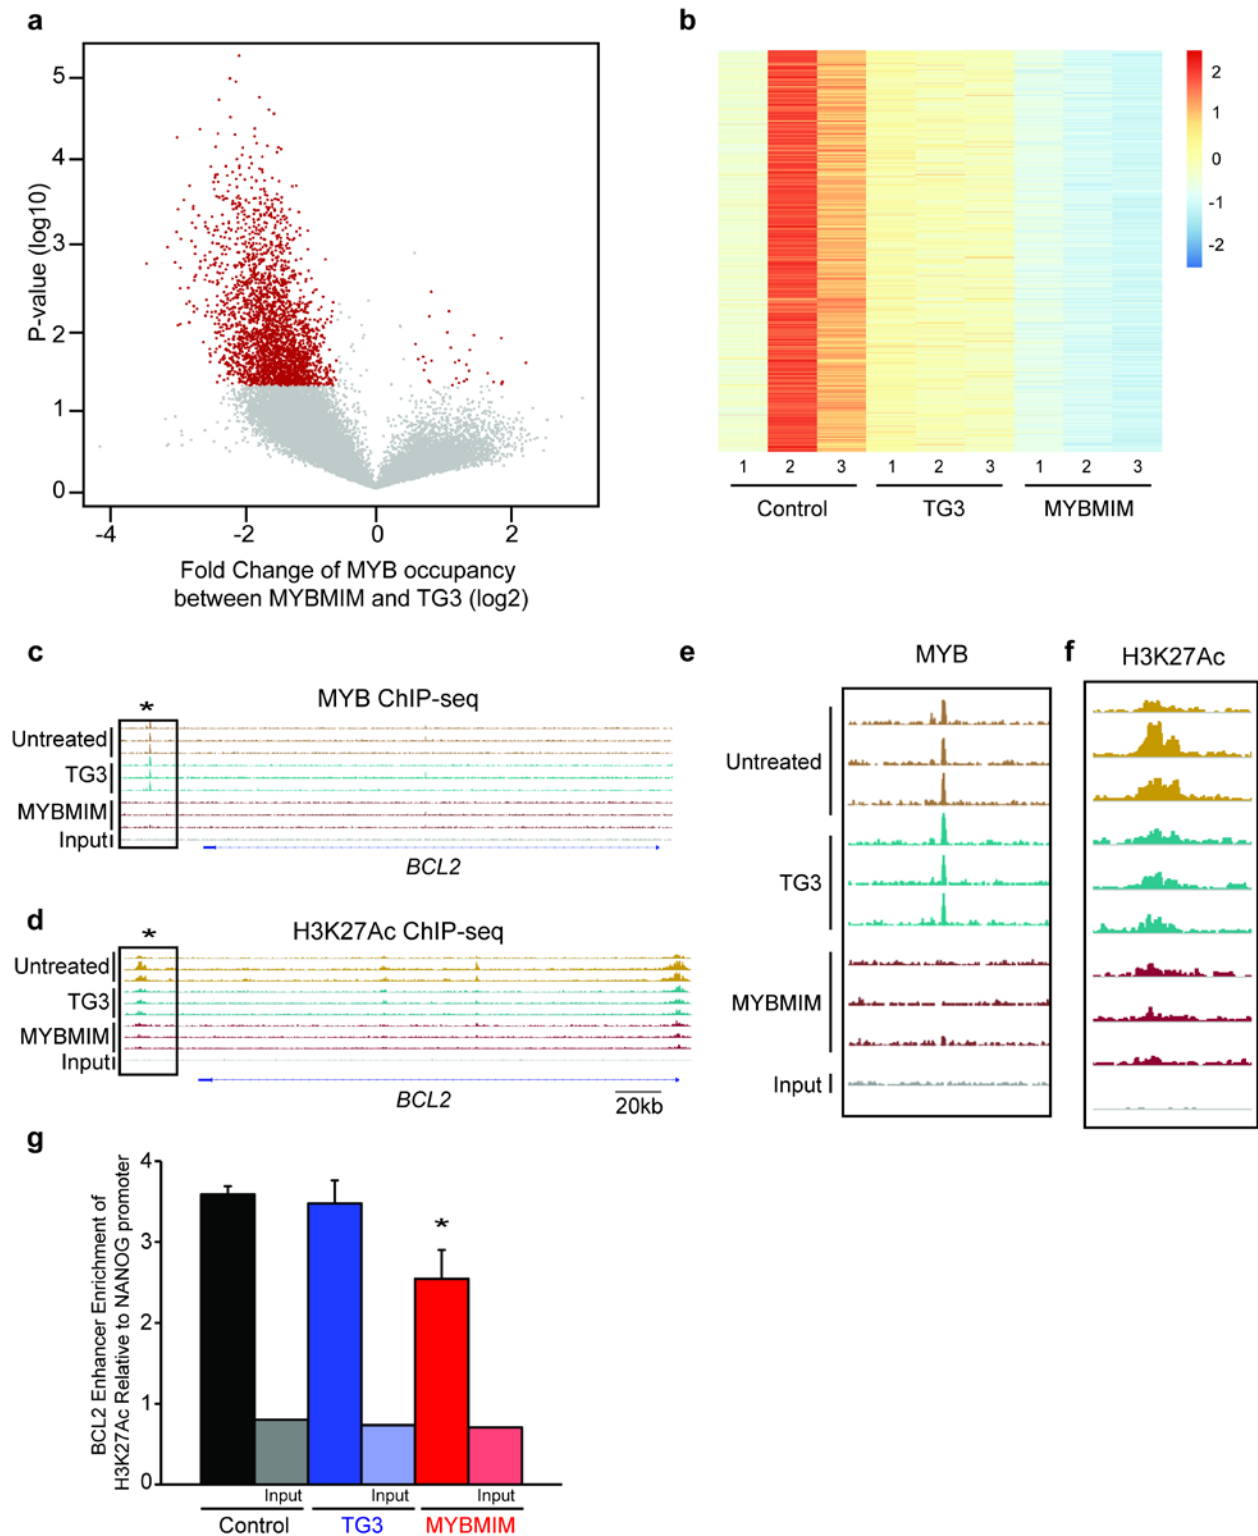

672

**Figure 3. MYBMIM suppresses the assembly of chromatin complexes.** (a) Volcano plot of MYB occupancy in MV-411 cells treated with 20  $\mu$ M MYBMIM versus TG3 control for 6 hours, as analyzed by MYB ChIP-seq. p-values denote t-test statistical significance of 3 biological replicates. (b) Heatmap of changes in H3K27Ac occupancy of MV411 treated with 20  $\mu$ M MYBMIM versus TG3 control for 24 hours, as analyzed by ChIP-seq of three biological replicates. (c) Genome track of the *BCL2* locus showing elimination of the MYB-bound enhancer (star) upon treatment with MYBMIM, but not control or TG3 treatment. (d) Genome track of the *BCL2* locus showing elimination of the H3K27Ac-bound enhancer (star) upon treatment with MYBMIM, but not control or TG3 treatment. (e) Magnified boxed area of MYB-bound enhancer peak shown in 3c. (f) Magnified boxed area of H3K27Ac-bound enhancer peak shown in 3d. (g) Analysis of relative enrichment of H3K27Ac at the *BCL2* enhancer locus compared to NANOG, as measured by ChIP-PCR upon treatment with control PBS (black), 20  $\mu$ M TG3 (blue), and 20  $\mu$ M MYBMIM (red) for 24 hours. Error bars represent standard deviations of three biological replicates. \*  $p = 8.6e-3$  when compared to untreated control.



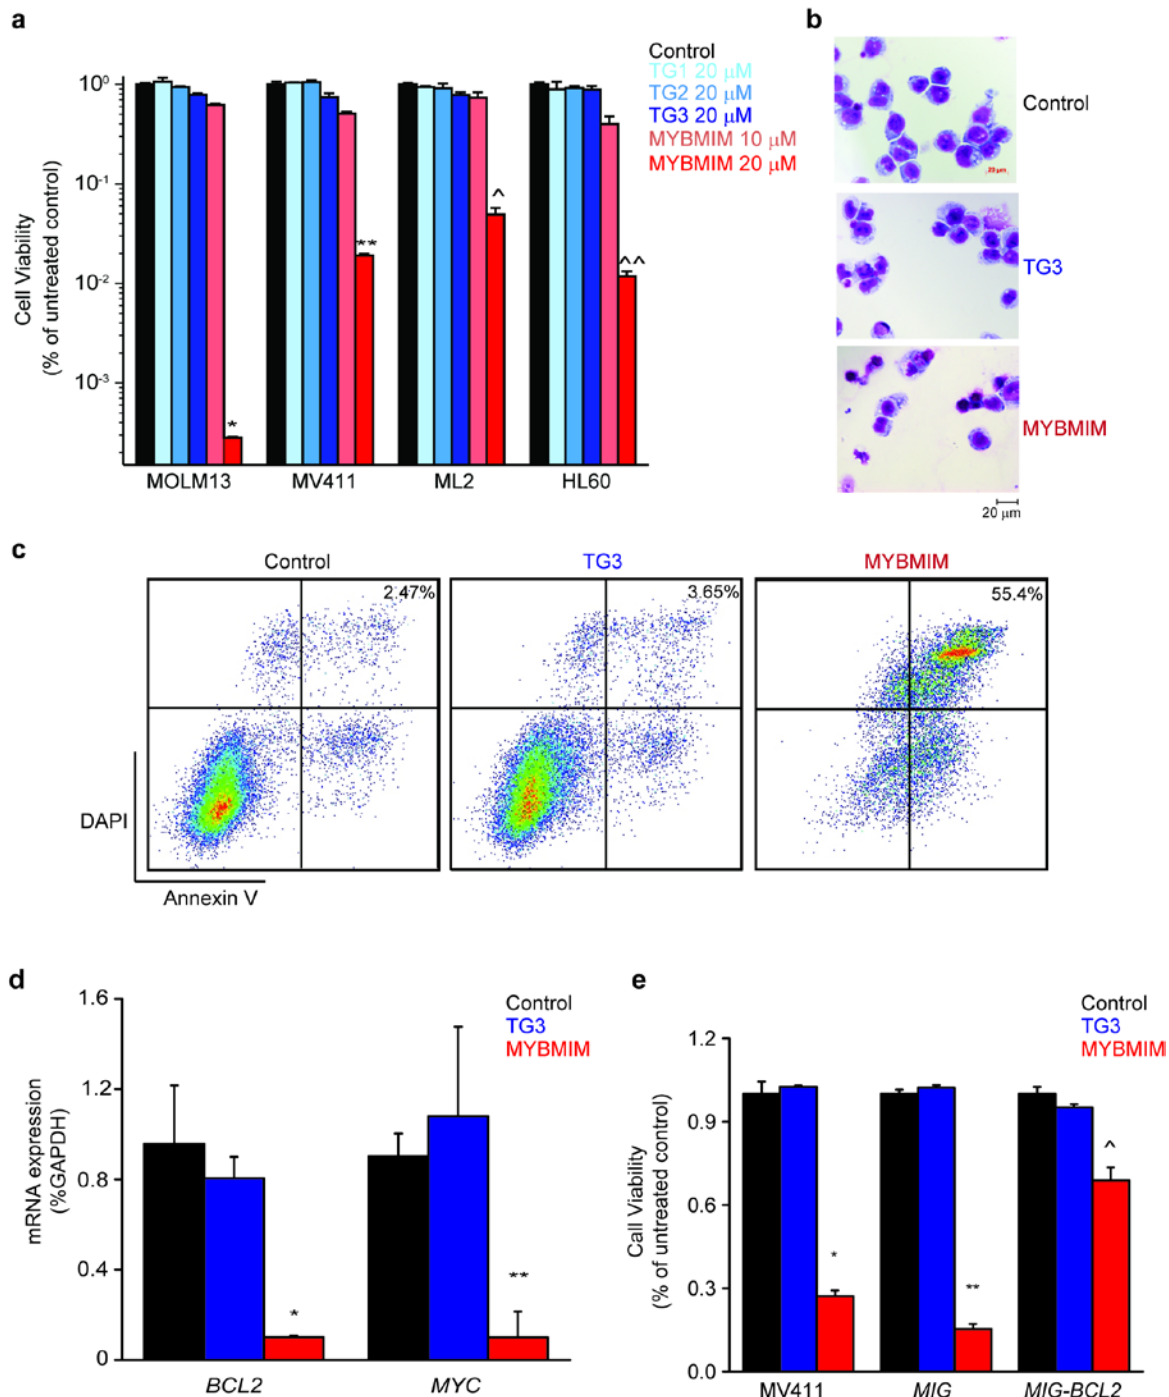

**Figure 4. MYBMIM induces apoptosis and downregulates MYB-regulated genes.** (a) Viability of MOLM-13, MV-411, ML2 and HL60 cells, treated for 6 days with control PBS (black), 20  $\mu$ M TG1, TG2, or TG3 (blue), and 10  $\mu$ M MYBMIM (orange) and 20  $\mu$ M MYBMIM (red), with peptide replacement every 48 hours. Error bars represent standard deviations of three biological replicates. \*,  $p = 7.2e-7$ ; \*\*,  $p = 9e-6$ ; ^,  $p = 1.7e-6$ ; ^^  $p = 3.3e-6$  when compared to untreated control. (b) Representative photographs of Giemsa-stained MV-411 cells after 6h treatment as indicated. Scale bar corresponds to 20  $\mu$ m. (c) Flow cytometry analysis of apoptosis of MV-411 cells upon peptide treatment at 20  $\mu$ M for 24 hours, as indicated. Numbers denote percentage of cells that are both Annexin V and DAPI positive. (d) Analysis of *BCL2* and *MYC* mRNA expression in MV411 cells as measured by qRT-PCR, upon treatment with control PBS (black), 20  $\mu$ M TG3 (blue), and 20  $\mu$ M MYBMIM (red) for 6 hours. Error bars represent standard deviations of three biological replicates. \*,  $p = 0.0046$ ; \*\*,  $p = 0.008$  when compared to untreated control. (e) MV-411 cells expressing MSCV-IRES-GFP (MIG) BCL2 but not empty MIG or wild-type cells are protected from treatment with 20  $\mu$ M MYBMIM (red) as compared to control PBS (black) and 20  $\mu$ M TG3 (blue) peptides. Error bars represent standard deviations of 3 biological replicates. \*,  $p = 1.4e-5$ ; \*\*,  $p = 4.2e-7$ ; ^  $p = 0.0005$  MYBMIM treatment compared to respective untreated controls.

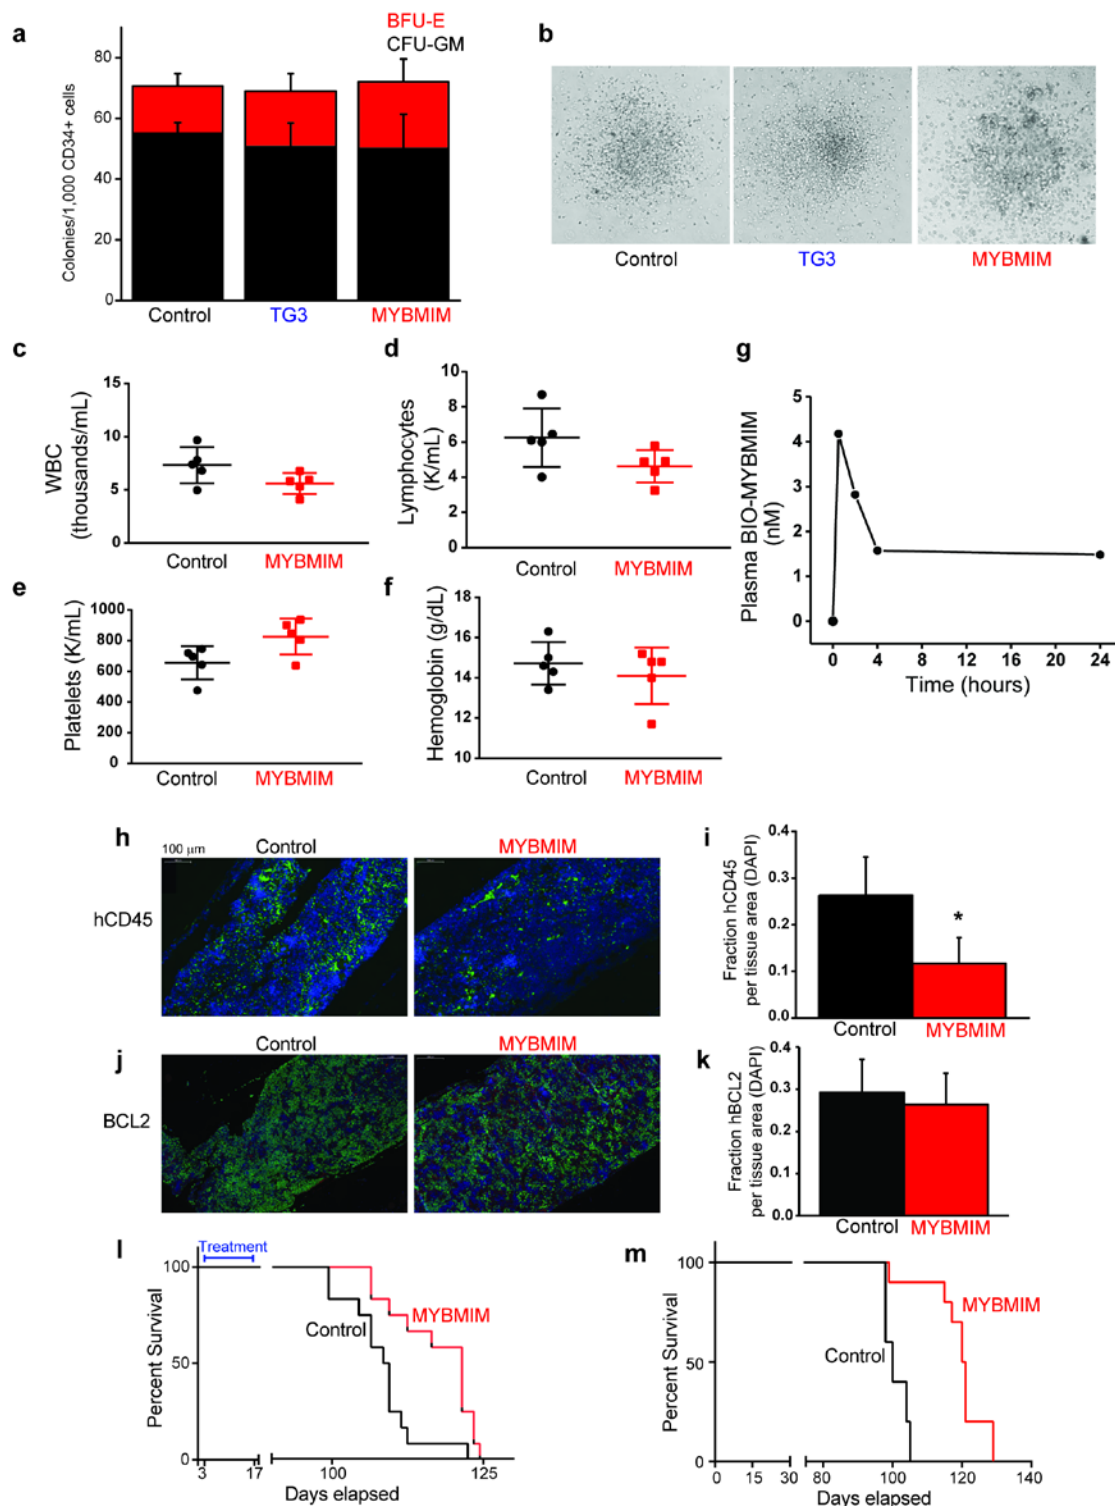

**Figure 5. MYBMIM exhibits anti-leukemia efficacy in vivo.** (a) Activity of burst forming units-erythroid (BFU-E, red) and colony forming units-granulocyte/monocyte (CFU-GM, black) of CD34<sup>+</sup> human umbilical cord progenitor cells treated with control PBS, or 20  $\mu$ M TG3 or MYBMIM for 14 days. Error bars represent the standard deviation of 3 biologic replicates. (b) Representative phase photographs of CFU-GM colonies treated as indicated. (c-f) Peripheral blood count analysis of C57BL/6J mice treated for 7 days with MYBMIM (25 mg/kg IP daily), as compared to control PBS. Bars indicate the mean and standard deviation of individual mice. (g) Plasma concentration of BIO-MYBMIM after one-time IP injection of 25 mg/kg in C57BL/6J mice. Plasma was collected at 30 min, 2 h, 4 h, and 24 h post-injection and the concentration of BIO-MYBMIM was determined by spectrophotometric avidin reaction. (h) Representative fluorescent micrographs of human-specific CD45 staining (green) and DAPI staining (blue) in femur sections of NSG mice engrafted with primary patient-derived MLL-rearranged leukemia cells and treated with MYBMIM (25 mg/kg IP daily) as compared to control PBS for 21 days upon development of peripheral leukemia, quantified in (i). Error bars represent standard deviation of 6 individual mice. \*  $p = 1.2 \times 10^{-4}$ , log-transformed  $t$ -test. (j) Images of fluorescent micrographs of human BCL2 (green) and DAPI (blue), quantified in (k). Error bars represent standard deviation of 6 individual mice. \*  $p = 0.3$ , log-transformed  $t$ -test. (l) Kaplan-Meier survival analysis of NSG mice engrafted with primary patient-derived MLL-rearranged leukemia cells and treated 3 days post transplantation with MYBMIM (red, 25 mg/kg IP twice daily) as compared to control PBS (black) for 14 days.  $n = 15$  mice per group.  $p = 0.0038$ , log-rank test. (m) Kaplan-Meier survival analysis of NSG mice serially transplanted with bone marrow from primary patient-derived MLL-rearranged leukemia cells treated with MYBMIM for 14 days.  $n = 10$  mice per group.  $p < 0.0001$ , log-rank test.

- 675 1 Zor, T., De Guzman, R. N., Dyson, H. J. & Wright, P. E. Solution structure of the KIX domain of  
676 CBP bound to the transactivation domain of c-Myb. *Journal of molecular biology* **337**, 521-534,  
677 doi:10.1016/j.jmb.2004.01.038 (2004).
- 678 2 Zuber, J. *et al.* An integrated approach to dissecting oncogene addiction implicates a Myb-  
679 coordinated self-renewal program as essential for leukemia maintenance. *Genes & development*  
680 **25**, 1628-1640, doi:10.1101/gad.17269211 (2011).
- 681 3 de Rooij, J. D., Zwaan, C. M. & van den Heuvel-Eibrink, M. Pediatric AML: From Biology to Clinical  
682 Management. *Journal of clinical medicine* **4**, 127-149, doi:10.3390/jcm4010127 (2015).
- 683 4 Breems, D. A. *et al.* Prognostic index for adult patients with acute myeloid leukemia in first  
684 relapse. *Journal of clinical oncology : official journal of the American Society of Clinical Oncology*  
685 **23**, 1969-1978, doi:10.1200/JCO.2005.06.027 (2005).
- 686 5 Klco, J. M. *et al.* Functional heterogeneity of genetically defined subclones in acute myeloid  
687 leukemia. *Cancer cell* **25**, 379-392, doi:10.1016/j.ccr.2014.01.031 (2014).
- 688 6 Papaemmanuil, E. *et al.* Genomic Classification and Prognosis in Acute Myeloid Leukemia. *The*  
689 *New England journal of medicine* **374**, 2209-2221, doi:10.1056/NEJMoa1516192 (2016).
- 690 7 Look, A. T. Oncogenic transcription factors in the human acute leukemias. *Science* **278**, 1059-  
691 1064 (1997).
- 692 8 Bernt, K. M. *et al.* MLL-rearranged leukemia is dependent on aberrant H3K79 methylation by  
693 DOT1L. *Cancer cell* **20**, 66-78, doi:10.1016/j.ccr.2011.06.010 (2011).
- 694 9 Chen, C. W. *et al.* DOT1L inhibits SIRT1-mediated epigenetic silencing to maintain leukemic gene  
695 expression in MLL-rearranged leukemia. *Nature medicine* **21**, 335-343, doi:10.1038/nm.3832  
696 (2015).
- 697 10 Pelish, H. E. *et al.* Mediator kinase inhibition further activates super-enhancer-associated genes  
698 in AML. *Nature* **526**, 273-276, doi:10.1038/nature14904 (2015).
- 699 11 Bhagwat, A. S. *et al.* BET Bromodomain Inhibition Releases the Mediator Complex from Select  
700 cis-Regulatory Elements. *Cell reports* **15**, 519-530, doi:10.1016/j.celrep.2016.03.054 (2016).
- 701 12 Pattabiraman, D. R. *et al.* Interaction of c-Myb with p300 is required for the induction of acute  
702 myeloid leukemia (AML) by human AML oncogenes. *Blood* **123**, 2682-2690, doi:10.1182/blood-  
703 2012-02-413187 (2014).
- 704 13 Giotopoulos, G. *et al.* The epigenetic regulators CBP and p300 facilitate leukemogenesis and  
705 represent therapeutic targets in acute myeloid leukemia. *Oncogene* **35**, 279-289,  
706 doi:10.1038/onc.2015.92 (2016).
- 707 14 Clappier, E. *et al.* The C-MYB locus is involved in chromosomal translocation and genomic  
708 duplications in human T-cell acute leukemia (T-ALL), the translocation defining a new T-ALL  
709 subtype in very young children. *Blood* **110**, 1251-1261, doi:10.1182/blood-2006-12-064683  
710 (2007).
- 711 15 Lahortiga, I. *et al.* Duplication of the MYB oncogene in T cell acute lymphoblastic leukemia.  
712 *Nature genetics* **39**, 593-595, doi:10.1038/ng2025 (2007).
- 713 16 Roe, J. S., Mercan, F., Rivera, K., Pappin, D. J. & Vakoc, C. R. BET Bromodomain Inhibition  
714 Suppresses the Function of Hematopoietic Transcription Factors in Acute Myeloid Leukemia.  
715 *Molecular cell* **58**, 1028-1039, doi:10.1016/j.molcel.2015.04.011 (2015).
- 716 17 Mullighan, C. G. *et al.* CREBBP mutations in relapsed acute lymphoblastic leukaemia. *Nature* **471**,  
717 235-239, doi:10.1038/nature09727 (2011).
- 718 18 Cancer Genome Atlas Research, N. Genomic and epigenomic landscapes of adult de novo acute  
719 myeloid leukemia. *The New England journal of medicine* **368**, 2059-2074,  
720 doi:10.1056/NEJMoa1301689 (2013).

- 721 19 Bowers, E. M. *et al.* Virtual ligand screening of the p300/CBP histone acetyltransferase:  
722 identification of a selective small molecule inhibitor. *Chemistry & biology* **17**, 471-482,  
723 doi:10.1016/j.chembiol.2010.03.006 (2010).
- 724 20 Romero, F. A. *et al.* Disrupting Acetyl-Lysine Recognition: Progress in the Development of  
725 Bromodomain Inhibitors. *Journal of medicinal chemistry* **59**, 1271-1298,  
726 doi:10.1021/acs.jmedchem.5b01514 (2016).
- 727 21 Pattabiraman, D. R. & Gonda, T. J. Role and potential for therapeutic targeting of MYB in  
728 leukemia. *Leukemia* **27**, 269-277, doi:10.1038/leu.2012.225 (2013).
- 729 22 Uttarkar, S. *et al.* Targeting acute myeloid leukemia with a small molecule inhibitor of the  
730 Myb/p300 interaction. *Blood* **127**, 1173-1182, doi:10.1182/blood-2015-09-668632 (2016).
- 731 23 Uttarkar, S. *et al.* Naphthol AS-E Phosphate Inhibits the Activity of the Transcription Factor Myb  
732 by Blocking the Interaction with the KIX Domain of the Coactivator p300. *Molecular cancer*  
733 *therapeutics* **14**, 1276-1285, doi:10.1158/1535-7163.MCT-14-0662 (2015).
- 734 24 Radhakrishnan, I. *et al.* Solution structure of the KIX domain of CBP bound to the transactivation  
735 domain of CREB: a model for activator:coactivator interactions. *Cell* **91**, 741-752 (1997).
- 736 25 Fischer, R., Kohler, K., Fotin-Mleczek, M. & Brock, R. A stepwise dissection of the intracellular  
737 fate of cationic cell-penetrating peptides. *The Journal of biological chemistry* **279**, 12625-12635,  
738 doi:10.1074/jbc.M311461200 (2004).
- 739 26 van den Berg, A. & Dowdy, S. F. Protein transduction domain delivery of therapeutic  
740 macromolecules. *Current opinion in biotechnology* **22**, 888-893,  
741 doi:10.1016/j.copbio.2011.03.008 (2011).
- 742 27 Adams, H. A. *et al.* [Definition of shock types]. *Anesthesiol Intensivmed Notfallmed Schmerzther*  
743 **36 Suppl 2**, S140-143, doi:10.1055/s-2001-18174 (2001).
- 744 28 Lee, H. J. & Pardridge, W. M. Pharmacokinetics and delivery of tat and tat-protein conjugates to  
745 tissues in vivo. *Bioconjug Chem* **12**, 995-999 (2001).
- 746 29 Violini, S., Sharma, V., Prior, J. L., Dyszlewski, M. & Piwnicka-Worms, D. Evidence for a plasma  
747 membrane-mediated permeability barrier to Tat basic domain in well-differentiated epithelial  
748 cells: lack of correlation with heparan sulfate. *Biochemistry* **41**, 12652-12661 (2002).
- 749 30 Fawell, S. *et al.* Tat-mediated delivery of heterologous proteins into cells. *Proceedings of the*  
750 *National Academy of Sciences of the United States of America* **91**, 664-668 (1994).
- 751 31 Cerchietti, L. C. *et al.* A peptomimetic inhibitor of BCL6 with potent antilymphoma effects in  
752 vitro and in vivo. *Blood* **113**, 3397-3405, doi:10.1182/blood-2008-07-168773 (2009).
- 753 32 Li, C. *et al.* Limitations of peptide retro-inverso isomerization in molecular mimicry. *The Journal*  
754 *of biological chemistry* **285**, 19572-19581, doi:10.1074/jbc.M110.116814 (2010).
- 755 33 Kasper, L. H. *et al.* CBP/p300 double null cells reveal effect of coactivator level and diversity on  
756 CREB transactivation. *The EMBO journal* **29**, 3660-3672, doi:10.1038/emboj.2010.235 (2010).
- 757 34 Jin, Q. *et al.* Distinct roles of GCN5/PCAF-mediated H3K9ac and CBP/p300-mediated H3K18/27ac  
758 in nuclear receptor transactivation. *The EMBO journal* **30**, 249-262,  
759 doi:10.1038/emboj.2010.318 (2011).
- 760 35 Zhao, L. *et al.* Integrated genome-wide chromatin occupancy and expression analyses identify  
761 key myeloid pro-differentiation transcription factors repressed by Myb. *Nucleic acids research*  
762 **39**, 4664-4679, doi:10.1093/nar/gkr024 (2011).
- 763 36 Pasini, D. *et al.* Characterization of an antagonistic switch between histone H3 lysine 27  
764 methylation and acetylation in the transcriptional regulation of Polycomb group target genes.  
765 *Nucleic acids research* **38**, 4958-4969, doi:10.1093/nar/gkq244 (2010).
- 766 37 Palm, C., Jayamanne, M., Kjellander, M. & Hallbrink, M. Peptide degradation is a critical  
767 determinant for cell-penetrating peptide uptake. *Biochim Biophys Acta* **1768**, 1769-1776,  
768 doi:10.1016/j.bbame.2007.03.029 (2007).

- 769 38 Moore, M. A. & Hoskins, I. Ex vivo expansion of cord blood-derived stem cells and progenitors.  
770 *Blood Cells* **20**, 468-479; discussion 479-481 (1994).
- 771 39 Hnisz, D. *et al.* Super-enhancers in the control of cell identity and disease. *Cell* **155**, 934-947,  
772 doi:10.1016/j.cell.2013.09.053 (2013).
- 773 40 Kung, A. L. *et al.* Small molecule blockade of transcriptional coactivation of the hypoxia-inducible  
774 factor pathway. *Cancer cell* **6**, 33-43, doi:10.1016/j.ccr.2004.06.009 (2004).
- 775 41 Mitton, B. *et al.* Small molecule inhibition of cAMP response element binding protein in human  
776 acute myeloid leukemia cells. *Leukemia* **30**, 2302-2311, doi:10.1038/leu.2016.139 (2016).
- 777 42 Uttarkar, S. *et al.* Small-Molecule Disruption of the Myb/p300 Cooperation Targets Acute  
778 Myeloid Leukemia Cells. *Molecular cancer therapeutics* **15**, 2905-2915, doi:10.1158/1535-  
779 7163.MCT-16-0185 (2016).
- 780 43 Picaud, S. *et al.* Generation of a Selective Small Molecule Inhibitor of the CBP/p300  
781 Bromodomain for Leukemia Therapy. *Cancer research* **75**, 5106-5119, doi:10.1158/0008-  
782 5472.CAN-15-0236 (2015).
- 783 44 Gerona-Navarro, G. *et al.* Rational design of cyclic peptide modulators of the transcriptional  
784 coactivator CBP: a new class of p53 inhibitors. *Journal of the American Chemical Society* **133**,  
785 2040-2043, doi:10.1021/ja107761h (2011).
- 786 45 Walensky, L. D. & Bird, G. H. Hydrocarbon-stapled peptides: principles, practice, and progress.  
787 *Journal of medicinal chemistry* **57**, 6275-6288, doi:10.1021/jm4011675 (2014).
- 788 46 Deshayes, S., Morris, M. C., Divita, G. & Heitz, F. Cell-penetrating peptides: tools for intracellular  
789 delivery of therapeutics. *Cellular and molecular life sciences : CMLS* **62**, 1839-1849,  
790 doi:10.1007/s00018-005-5109-0 (2005).
- 791 47 Kasper, L. H. *et al.* A transcription-factor-binding surface of coactivator p300 is required for  
792 haematopoiesis. *Nature* **419**, 738-743, doi:10.1038/nature01062 (2002).
- 793 48 Cheng, G. *et al.* Loss of p300 accelerates MDS-associated leukemogenesis. *Leukemia*,  
794 doi:10.1038/leu.2016.347 (2017).
- 795 49 Wang, L. *et al.* The leukemogenicity of AML1-ETO is dependent on site-specific lysine  
796 acetylation. *Science* **333**, 765-769, doi:10.1126/science.1201662 (2011).
- 797 50 Ogiwara, H. *et al.* Targeting p300 Addiction in CBP-Deficient Cancers Causes Synthetic Lethality  
798 by Apoptotic Cell Death due to Abrogation of MYC Expression. *Cancer discovery* **6**, 430-445,  
799 doi:10.1158/2159-8290.CD-15-0754 (2016).
- 800 51 Yadav, V. K. *et al.* Promoter-proximal transcription factor binding is transcriptionally active when  
801 coupled with nucleosome repositioning in immediate vicinity. *Nucleic acids research* **42**, 9602-  
802 9611, doi:10.1093/nar/gku596 (2014).
- 803 52 Piskacek, M., Vasku, A., Hajek, R. & Knight, A. Shared structural features of the 9aaTAD family in  
804 complex with CBP. *Molecular bioSystems* **11**, 844-851, doi:10.1039/c4mb00672k (2015).
- 805 53 Goto, N. K., Zor, T., Martinez-Yamout, M., Dyson, H. J. & Wright, P. E. Cooperativity in  
806 transcription factor binding to the coactivator CREB-binding protein (CBP). The mixed lineage  
807 leukemia protein (MLL) activation domain binds to an allosteric site on the KIX domain. *The*  
808 *Journal of biological chemistry* **277**, 43168-43174, doi:10.1074/jbc.M207660200 (2002).
- 809 54 Ernst, P., Wang, J., Huang, M., Goodman, R. H. & Korsmeyer, S. J. MLL and CREB bind  
810 cooperatively to the nuclear coactivator CREB-binding protein. *Molecular and cellular biology*  
811 **21**, 2249-2258, doi:10.1128/MCB.21.7.2249-2258.2001 (2001).
- 812 55 Zhao, L., Ye, P. & Gonda, T. J. The MYB proto-oncogene suppresses monocytic differentiation of  
813 acute myeloid leukemia cells via transcriptional activation of its target gene GFI1. *Oncogene* **33**,  
814 4442-4449, doi:10.1038/onc.2013.419 (2014).
- 815 56 Sano, Y. *et al.* CBP alleviates the intramolecular inhibition of ATF-2 function. *The Journal of*  
816 *biological chemistry* **273**, 29098-29105 (1998).

- 817 57 Sanda, T. *et al.* TYK2-STAT1-BCL2 pathway dependence in T-cell acute lymphoblastic leukemia.  
818 *Cancer discovery* **3**, 564-577, doi:10.1158/2159-8290.CD-12-0504 (2013).
- 819 58 Mezei, M. Simulaid: a simulation facilitator and analysis program. *J Comput Chem* **31**, 2658-  
820 2668, doi:10.1002/jcc.21551 (2010).
- 821 59 Bowers, K. J. *et al.* in *Proceedings of the 2006 ACM/IEEE conference on Supercomputing* 84  
822 (ACM, Tampa, Florida, 2006).
- 823 60 Harder, E. *et al.* OPLS3: A Force Field Providing Broad Coverage of Drug-like Small Molecules and  
824 Proteins. *Journal of Chemical Theory and Computation* **12**, 281-296,  
825 doi:10.1021/acs.jctc.5b00864 (2016).
- 826 61 Cheatham, T. E., III, Miller, J. L., Fox, T., Darden, T. A. & Kollman, P. A. Molecular Dynamics  
827 Simulations on Solvated Biomolecular Systems: The Particle Mesh Ewald Method Leads to Stable  
828 Trajectories of DNA, RNA, and Proteins. *Journal of the American Chemical Society* **117**, 4193-  
829 4194, doi:10.1021/ja00119a045 (1995).
- 830 62 Darden, T., York, D. & Pedersen, L. Particle mesh Ewald: An N·log(N) method for Ewald sums in  
831 large systems. *The Journal of Chemical Physics* **98**, 10089-10092, doi:10.1063/1.464397 (1993).
- 832 63 Tuckerman, M., Berne, B. J. & Martyna, G. J. Reversible multiple time scale molecular dynamics.  
833 *The Journal of Chemical Physics* **97**, 1990-2001, doi:10.1063/1.463137 (1992).
- 834 64 Ogryzko, V. V., Schiltz, R. L., Russanova, V., Howard, B. H. & Nakatani, Y. The transcriptional  
835 coactivators p300 and CBP are histone acetyltransferases. *Cell* **87**, 953-959 (1996).
- 836 65 Krivtsov, A. V. *et al.* H3K79 methylation profiles define murine and human MLL-AF4 leukemias.  
837 *Cancer cell* **14**, 355-368, doi:10.1016/j.ccr.2008.10.001 (2008).

838
